# Supplementary material for: Whole-genome resequencing reveals genetic diversity and adaptive evolution in Chinese honeybee (Apis cerana cerana) in Guizhou, China
Source: Front Genet. 2024 May 17;15:1352455. doi: 10.3389/fgene.2024.1352455 (PMC11140131; doi:10.3389/fgene.2024.1352455)
Supplement: Supplementary file 2 [file Table1.XLSX]

## Sheet: Supplementary Table 5
	Supplementary Table S5 Selected regions and gene annotation of the genome of the Apis cerana in western Guizhou Province, China
	Gene_ID	Product	Chrom	Bin_start	Bin_end	PiEastern	Pi.Western	log2(PiEastern /PiWestern)	FST
	-	-	KZ288185.1	2580001	2620000	0.000607	0.000638	0.0710461	0.0254424
	-	-	KZ288186.1	4000001	4040000	0.0002	0.000214	0.0987502	0.0304531
	APICC_04590	antigen protein	KZ288186.1	4040001	4080000	0.000179	0.000197	0.134252	0.10208
	APICC_07400	hypothetical protein	KZ288186.1	4040001	4080000	0.000179	0.000197	0.134252	0.10208
	APICC_05835	Glucose-6-phosphate 1-dehydrogenase	KZ288189.1	640001	680000	0.000481	0.000546	0.184553	0.107518
	APICC_02346	hypothetical protein	KZ288189.1	640001	680000	0.000481	0.000546	0.184553	0.107518
	APICC_02348	hypothetical protein	KZ288189.1	640001	680000	0.000481	0.000546	0.184553	0.107518
	APICC_05834	Protein GAMETE EXPRESSED	KZ288189.1	640001	680000	0.000481	0.000546	0.184553	0.107518
	APICC_05836	Protein wntless	KZ288189.1	640001	680000	0.000481	0.000546	0.184553	0.107518
	APICC_02347	Coiled-coil-helix-coiled-coil-helix domain-containing protein	KZ288189.1	640001	680000	0.000481	0.000546	0.184553	0.107518
	APICC_01577	Tectonin beta-propeller repeat-containing protein	KZ288191.1	1940001	1980000	0.00026	0.000297	0.189116	0.0256648
	APICC_01578	Putative inositol monophosphatase	KZ288191.1	1940001	1980000	0.00026	0.000297	0.189116	0.0256648
	APICC_04966	CAS1 domain-containing protein	KZ288191.1	1940001	1980000	0.00026	0.000297	0.189116	0.0256648
	APICC_08770	DNA replication factor Cdt1	KZ288191.1	1940001	1980000	0.00026	0.000297	0.189116	0.0256648
	APICC_07253	Mpv17 protein	KZ288191.1	1940001	1980000	0.00026	0.000297	0.189116	0.0256648
	APICC_06134	Cell growth-regulating nucleolar protein	KZ288191.1	1940001	1980000	0.00026	0.000297	0.189116	0.0256648
	APICC_04967	39S ribosomal protein L33	KZ288191.1	1940001	1980000	0.00026	0.000297	0.189116	0.0256648
	APICC_02623	hypothetical protein	KZ288191.1	1940001	1980000	0.00026	0.000297	0.189116	0.0256648
	APICC_09481	Dystrobrevin beta	KZ288195.1	380001	420000	0.000128	0.000157	0.291419	0.0390354
	APICC_02249	Actin-binding protein anillin	KZ288195.1	380001	420000	0.000128	0.000157	0.291419	0.0390354
	APICC_00281	Serine/threonine-protein phosphatase 2A regulatory subunit B'' subunit gamma	KZ288195.1	380001	420000	0.000128	0.000157	0.291419	0.0390354
	APICC_09066	Flexible cuticle protein	KZ288195.1	380001	420000	0.000128	0.000157	0.291419	0.0390354
	APICC_00703	RING-box protein	KZ288203.1	2260001	2300000	0.00019	0.000224	0.241248	0.0376893
	APICC_09650	Fanconi anemia group M protein	KZ288203.1	2260001	2300000	0.00019	0.000224	0.241248	0.0376893
	APICC_09977	facilitated trehalose transporter Tret1	KZ288203.1	2260001	2300000	0.00019	0.000224	0.241248	0.0376893
	APICC_03984	Serine/threonine-protein kinase PAK mbt	KZ288203.1	2260001	2300000	0.00019	0.000224	0.241248	0.0376893
	APICC_00703	RING-box protein	KZ288203.1	2280001	2320000	0.000329	0.000352	0.097877	0.0282349
	APICC_09977	facilitated trehalose transporter Tret1	KZ288203.1	2280001	2320000	0.000329	0.000352	0.097877	0.0282349
	APICC_09505	Protein diaphanous	KZ288203.1	2280001	2320000	0.000329	0.000352	0.097877	0.0282349
	APICC_03985	Sugar transporter ERD6	KZ288203.1	2280001	2320000	0.000329	0.000352	0.097877	0.0282349
	APICC_01139	Clavesin-2	KZ288203.1	2280001	2320000	0.000329	0.000352	0.097877	0.0282349
	APICC_03986	Methylmalonic aciduria and homocystinuria type D	KZ288203.1	2280001	2320000	0.000329	0.000352	0.097877	0.0282349
	APICC_06584	Golgi-specific brefeldin A-resistance guanine nucleotide exchange factor	KZ288204.1	1160001	1200000	0.000189	0.000217	0.195736	0.0349664
	APICC_01278	Cyclin-dependent kinase	KZ288204.1	1160001	1200000	0.000189	0.000217	0.195736	0.0349664
	APICC_04605	Zinc finger CCHC domain-containing protein	KZ288204.1	1160001	1200000	0.000189	0.000217	0.195736	0.0349664
	APICC_04608	hypothetical protein	KZ288204.1	1160001	1200000	0.000189	0.000217	0.195736	0.0349664
	APICC_04607	Group XIIA secretory phospholipase	KZ288204.1	1160001	1200000	0.000189	0.000217	0.195736	0.0349664
	APICC_04606	Glutaredoxin-C4	KZ288204.1	1160001	1200000	0.000189	0.000217	0.195736	0.0349664
	APICC_03267	Serine/threonine-protein kinase OSR1	KZ288204.1	2600001	2640000	0.000111	0.000123	0.152908	0.0320981
	APICC_04635	Transmembrane protein	KZ288204.1	2600001	2640000	0.000111	0.000123	0.152908	0.0320981
	APICC_03266	tRNA-dihydrouridine synthase 3	KZ288204.1	2600001	2640000	0.000111	0.000123	0.152908	0.0320981
	APICC_01301	Putative sodium-dependent multivitamin transporter	KZ288204.1	2600001	2640000	0.000111	0.000123	0.152908	0.0320981
	APICC_01302	hypothetical protein	KZ288204.1	2600001	2640000	0.000111	0.000123	0.152908	0.0320981
	APICC_03267	Serine/threonine-protein kinase OSR1	KZ288204.1	2620001	2660000	7.68e-05	7.89e-05	0.0404636	0.0460769
	APICC_01303	hypothetical protein	KZ288204.1	2620001	2660000	7.68e-05	7.89e-05	0.0404636	0.0460769
	APICC_04635	Transmembrane protein	KZ288204.1	2620001	2660000	7.68e-05	7.89e-05	0.0404636	0.0460769
	APICC_01304	Helix-loop-helix protein	KZ288204.1	2620001	2660000	7.68e-05	7.89e-05	0.0404636	0.0460769
	APICC_04640	Low-density lipoprotein receptor-related protein	KZ288204.1	2780001	2820000	0.000105	0.000127	0.268343	0.0268746
	APICC_09041	RNA-binding protein fusilli	KZ288206.1	280001	320000	0.000173	0.000185	0.0989928	0.0256875
	APICC_01411	XK-related protein	KZ288206.1	280001	320000	0.000173	0.000185	0.0989928	0.0256875
	APICC_08689	GPI mannosyltransferase	KZ288206.1	280001	320000	0.000173	0.000185	0.0989928	0.0256875
	APICC_04744	BRCA1-A complex subunit BRE	KZ288206.1	280001	320000	0.000173	0.000185	0.0989928	0.0256875
	APICC_08688	YjeF N-terminal domain-containing protein	KZ288206.1	280001	320000	0.000173	0.000185	0.0989928	0.0256875
	APICC_04745	Dynein light chain roadblock-type	KZ288206.1	280001	320000	0.000173	0.000185	0.0989928	0.0256875
	APICC_09781	Coronin-2B	KZ288206.1	360001	400000	0.000221	0.000228	0.045496	0.0264475
	APICC_01412	Eukaryotic translation initiation factor	KZ288206.1	360001	400000	0.000221	0.000228	0.045496	0.0264475
	APICC_04747	Proliferation-associatedG4	KZ288206.1	360001	400000	0.000221	0.000228	0.045496	0.0264475
	APICC_04746	Exocyst complex component	KZ288206.1	360001	400000	0.000221	0.000228	0.045496	0.0264475
	APICC_09042	Centromere/kinetochore protein zw10	KZ288206.1	360001	400000	0.000221	0.000228	0.045496	0.0264475
	APICC_02195	NEDD8-activating enzyme E1 catalytic subunit	KZ288206.1	360001	400000	0.000221	0.000228	0.045496	0.0264475
	APICC_02194	RNA-binding protein Rsf1	KZ288206.1	360001	400000	0.000221	0.000228	0.045496	0.0264475
	APICC_04750	Programmed cell death protein	KZ288206.1	660001	700000	0.000316	0.000324	0.0347675	0.0286336
	APICC_01418	Double-strand break repair protein MRE11	KZ288206.1	660001	700000	0.000316	0.000324	0.0347675	0.0286336
	APICC_02198	Ubiquitin-conjugating enzyme E2	KZ288206.1	660001	700000	0.000316	0.000324	0.0347675	0.0286336
	APICC_04751	Dynactin subunit	KZ288206.1	660001	700000	0.000316	0.000324	0.0347675	0.0286336
	APICC_01416	Acyl-CoA dehydrogenase family member	KZ288206.1	660001	700000	0.000316	0.000324	0.0347675	0.0286336
	APICC_01417	40S ribosomal protein S14	KZ288206.1	660001	700000	0.000316	0.000324	0.0347675	0.0286336
	APICC_07168	hypothetical protein	KZ288206.1	660001	700000	0.000316	0.000324	0.0347675	0.0286336
	APICC_08799	Lachesin	KZ288210.1	2360001	2400000	0.000171	0.000191	0.162606	0.0416348
	APICC_08799	Lachesin	KZ288210.1	2380001	2420000	0.000174	0.000195	0.167186	0.0318366
	-	-	KZ288210.1	2440001	2480000	0.000126	0.000133	0.0735497	0.0452003
	-	-	KZ288210.1	2480001	2520000	0.000157	0.000168	0.0970709	0.0410133
	-	-	KZ288210.1	2680001	2720000	0.000171	0.000181	0.0833213	0.0796899
	APICC_01877	Zinc finger matrin-type protein	KZ288215.1	880001	920000	0.000179	0.000225	0.331597	0.276489
	APICC_07425	WD repeat-containing protein mio-B	KZ288215.1	880001	920000	0.000179	0.000225	0.331597	0.276489
	APICC_08898	6-phosphofructo-2-kinase/fructose-2%2C6-biphosphatase	KZ288215.1	880001	920000	0.000179	0.000225	0.331597	0.276489
	APICC_09264	6-phosphofructo-2-kinase/fructose-2%2C6-biphosphatase	KZ288215.1	880001	920000	0.000179	0.000225	0.331597	0.276489
	APICC_06116	Zinc finger protein	KZ288215.1	880001	920000	0.000179	0.000225	0.331597	0.276489
	APICC_02614	Ras-related protein Ral-a	KZ288215.1	880001	920000	0.000179	0.000225	0.331597	0.276489
	APICC_06117	ADP-dependent glucokinase	KZ288215.1	880001	920000	0.000179	0.000225	0.331597	0.276489
	APICC_01876	Minor histocompatibility antigen H13	KZ288215.1	880001	920000	0.000179	0.000225	0.331597	0.276489
	APICC_07424	hypothetical protein	KZ288215.1	880001	920000	0.000179	0.000225	0.331597	0.276489
	APICC_05282	Proteasome subunit beta type-2	KZ288215.1	880001	920000	0.000179	0.000225	0.331597	0.276489
	APICC_05283	Replication protein A	KZ288215.1	880001	920000	0.000179	0.000225	0.331597	0.276489
	APICC_07881	chitinase	KZ288215.1	900001	940000	0.000286	0.000411	0.522761	0.17463
	APICC_05284	YEATS domain-containing protein	KZ288215.1	900001	940000	0.000286	0.000411	0.522761	0.17463
	APICC_02615	Solute carrier family 2%2C facilitated glucose transporter member	KZ288215.1	900001	940000	0.000286	0.000411	0.522761	0.17463
	APICC_01877	Zinc finger matrin-type protein	KZ288215.1	900001	940000	0.000286	0.000411	0.522761	0.17463
	APICC_07425	WD repeat-containing protein mio-B	KZ288215.1	900001	940000	0.000286	0.000411	0.522761	0.17463
	APICC_09264	6-phosphofructo-2-kinase/fructose-2%2C6-biphosphatase	KZ288215.1	900001	940000	0.000286	0.000411	0.522761	0.17463
	APICC_08898	6-phosphofructo-2-kinase/fructose-2%2C6-biphosphatase	KZ288215.1	900001	940000	0.000286	0.000411	0.522761	0.17463
	APICC_02614	Ras-related protein Ral-a	KZ288215.1	900001	940000	0.000286	0.000411	0.522761	0.17463
	APICC_05283	Replication protein A	KZ288215.1	900001	940000	0.000286	0.000411	0.522761	0.17463
	APICC_07881	chitinase	KZ288215.1	920001	960000	0.00110459	0.00128006	0.2127	0.158851
	APICC_05284	YEATS domain-containing protein	KZ288215.1	920001	960000	0.00110459	0.00128006	0.2127	0.158851
	APICC_02615	Solute carrier family 2%2C facilitated glucose transporter member	KZ288215.1	920001	960000	0.00110459	0.00128006	0.2127	0.158851
	APICC_01878	Cell division protein kinase	KZ288215.1	920001	960000	0.00110459	0.00128006	0.2127	0.158851
	APICC_05286	Tyrosine-protein phosphatase non-receptor type	KZ288215.1	920001	960000	0.00110459	0.00128006	0.2127	0.158851
	APICC_09264	6-phosphofructo-2-kinase/fructose-2%2C6-biphosphatase	KZ288215.1	920001	960000	0.00110459	0.00128006	0.2127	0.158851
	APICC_08898	6-phosphofructo-2-kinase/fructose-2%2C6-biphosphatase	KZ288215.1	920001	960000	0.00110459	0.00128006	0.2127	0.158851
	APICC_05285	Pigment-dispersing factor	KZ288215.1	920001	960000	0.00110459	0.00128006	0.2127	0.158851
	APICC_02050	Lamin Dm0	KZ288220.1	20001	60000	0.000149	0.000155	0.0607326	0.0732507
	APICC_05500	Atherin	KZ288220.1	20001	60000	0.000149	0.000155	0.0607326	0.0732507
	APICC_05499	hypothetical protein	KZ288220.1	20001	60000	0.000149	0.000155	0.0607326	0.0732507
	APICC_02051	Prenylcysteine oxidase	KZ288220.1	20001	60000	0.000149	0.000155	0.0607326	0.0732507
	APICC_07694	Solute carrier family	KZ288220.1	20001	60000	0.000149	0.000155	0.0607326	0.0732507
	APICC_05501	Cystathionine gamma-lyase	KZ288220.1	20001	60000	0.000149	0.000155	0.0607326	0.0732507
	APICC_05502	Ribosome biogenesis protein BRX1	KZ288220.1	20001	60000	0.000149	0.000155	0.0607326	0.0732507
	APICC_02311	Transmembrane9	KZ288220.1	20001	60000	0.000149	0.000155	0.0607326	0.0732507
	APICC_02051	Prenylcysteine oxidase	KZ288220.1	40001	80000	0.000141	0.000147	0.0557497	0.0723616
	APICC_07694	Solute carrier family	KZ288220.1	40001	80000	0.000141	0.000147	0.0557497	0.0723616
	APICC_02052	CTL protein	KZ288220.1	40001	80000	0.000141	0.000147	0.0557497	0.0723616
	APICC_05504	Cysteine and glycine-rich protein	KZ288220.1	40001	80000	0.000141	0.000147	0.0557497	0.0723616
	APICC_05501	Cystathionine gamma-lyase	KZ288220.1	40001	80000	0.000141	0.000147	0.0557497	0.0723616
	APICC_05503	E3 ubiquitin-protein ligase Hakai	KZ288220.1	40001	80000	0.000141	0.000147	0.0557497	0.0723616
	APICC_02053	Transmembrane protein	KZ288220.1	40001	80000	0.000141	0.000147	0.0557497	0.0723616
	APICC_05502	Ribosome biogenesis protein BRX1	KZ288220.1	40001	80000	0.000141	0.000147	0.0557497	0.0723616
	APICC_02311	Transmembrane9	KZ288220.1	40001	80000	0.000141	0.000147	0.0557497	0.0723616
	APICC_02111	CCR4-NOT transcription complex subunit	KZ288223.1	460001	500000	0.00013	0.00015	0.205685	0.033949
	APICC_02110	Protein Jumonji	KZ288223.1	460001	500000	0.00013	0.00015	0.205685	0.033949
	APICC_05577	Pyruvate dehydrogenase phosphatase regulatory subunit	KZ288223.1	460001	500000	0.00013	0.00015	0.205685	0.033949
	APICC_07559	hypothetical protein	KZ288223.1	460001	500000	0.00013	0.00015	0.205685	0.033949
	APICC_02112	Negative elongation factor B	KZ288223.1	460001	500000	0.00013	0.00015	0.205685	0.033949
	APICC_04826	Coiled-coil domain-containing protein	KZ288223.1	460001	500000	0.00013	0.00015	0.205685	0.033949
	APICC_04825	Putative RNA polymerase II subunit B1 CTD phosphatase RPAP2	KZ288223.1	460001	500000	0.00013	0.00015	0.205685	0.033949
	APICC_04824	LITAF protein	KZ288223.1	460001	500000	0.00013	0.00015	0.205685	0.033949
	APICC_05636	Organic cation transporter protein	KZ288225.1	480001	520000	0.000275	0.000358	0.378287	0.0347621
	APICC_07610	hypothetical protein	KZ288225.1	480001	520000	0.000275	0.000358	0.378287	0.0347621
	APICC_06679	X-linked retinitis pigmentosa GTPase regulator	KZ288225.1	480001	520000	0.000275	0.000358	0.378287	0.0347621
	APICC_05636	Organic cation transporter protein	KZ288225.1	500001	540000	0.000518	0.000612	0.238681	0.0252156
	APICC_06679	X-linked retinitis pigmentosa GTPase regulator	KZ288225.1	500001	540000	0.000518	0.000612	0.238681	0.0252156
	APICC_02170	Protein strawberry notch	KZ288226.1	220001	260000	0.00015	0.000157	0.0620384	0.0932227
	APICC_05649	Elongator complex protein	KZ288226.1	220001	260000	0.00015	0.000157	0.0620384	0.0932227
	APICC_07619	Carbohydrate sulfotransferase	KZ288226.1	220001	260000	0.00015	0.000157	0.0620384	0.0932227
	APICC_02171	hypothetical protein	KZ288226.1	220001	260000	0.00015	0.000157	0.0620384	0.0932227
	APICC_05648	Histone-lysine N-methyltransferase pr-set7	KZ288226.1	220001	260000	0.00015	0.000157	0.0620384	0.0932227
	APICC_09338	Golgi SNAP receptor complex member	KZ288226.1	220001	260000	0.00015	0.000157	0.0620384	0.0932227
	APICC_05647	hypothetical protein	KZ288226.1	220001	260000	0.00015	0.000157	0.0620384	0.0932227
	APICC_05649	Elongator complex protein	KZ288226.1	240001	280000	9.4e-05	0.000106	0.170376	0.0661795
	APICC_02170	Protein strawberry notch	KZ288226.1	240001	280000	9.4e-05	0.000106	0.170376	0.0661795
	APICC_07966	Poly [ADP-ribose] polymerase	KZ288226.1	240001	280000	9.4e-05	0.000106	0.170376	0.0661795
	APICC_02171	hypothetical protein	KZ288226.1	240001	280000	9.4e-05	0.000106	0.170376	0.0661795
	APICC_02172	G2/mitotic-specific cyclin-B	KZ288226.1	240001	280000	9.4e-05	0.000106	0.170376	0.0661795
	APICC_05648	Histone-lysine N-methyltransferase pr-set7	KZ288226.1	240001	280000	9.4e-05	0.000106	0.170376	0.0661795
	APICC_05650	Down syndrome critical region protein	KZ288226.1	240001	280000	9.4e-05	0.000106	0.170376	0.0661795
	APICC_02296	Splicing factor 3B subunit	KZ288232.1	1560001	1600000	0.000276	0.000286	0.0511119	0.0280037
	APICC_05803	Transmembrane protein	KZ288232.1	1560001	1600000	0.000276	0.000286	0.0511119	0.0280037
	APICC_05804	Actin-binding protein IPP	KZ288232.1	1560001	1600000	0.000276	0.000286	0.0511119	0.0280037
	APICC_08644	Actin-binding protein IPP	KZ288232.1	1560001	1600000	0.000276	0.000286	0.0511119	0.0280037
	APICC_02295	hypothetical protein	KZ288232.1	1560001	1600000	0.000276	0.000286	0.0511119	0.0280037
	APICC_05802	Coenzyme Q-binding protein	KZ288232.1	1560001	1600000	0.000276	0.000286	0.0511119	0.0280037
	APICC_05805	hypothetical protein	KZ288232.1	1560001	1600000	0.000276	0.000286	0.0511119	0.0280037
	APICC_05878	hypothetical protein	KZ288234.1	1	40000	0.000345	0.000404	0.228838	0.0313504
	-	-	KZ288234.1	20001	60000	0.000643	0.000756	0.233204	0.0391302
	APICC_08073	hypothetical protein	KZ288234.1	40001	80000	0.000603	0.000699	0.215114	0.0380738
	APICC_08073	hypothetical protein	KZ288234.1	60001	100000	0.000792	0.000838	0.0817824	0.0496238
	APICC_08073	hypothetical protein	KZ288234.1	80001	120000	0.000911	0.000942	0.0478618	0.0470216
	APICC_08073	hypothetical protein	KZ288234.1	100001	140000	0.00066	0.000718	0.120954	0.0418322
	APICC_05885	mRNA-decapping enzyme	KZ288234.1	280001	320000	0.000365	0.000396	0.117335	0.0647811
	APICC_02405	28S ribosomal protein S21	KZ288234.1	280001	320000	0.000365	0.000396	0.117335	0.0647811
	APICC_02979	Heme oxygenase	KZ288234.1	280001	320000	0.000365	0.000396	0.117335	0.0647811
	APICC_05884	Phosphomevalonate kinase	KZ288234.1	280001	320000	0.000365	0.000396	0.117335	0.0647811
	APICC_05883	60S ribosomal protein L29	KZ288234.1	280001	320000	0.000365	0.000396	0.117335	0.0647811
	APICC_05885	mRNA-decapping enzyme	KZ288234.1	300001	340000	0.000685	0.000742	0.115136	0.0315332
	APICC_02979	Heme oxygenase	KZ288234.1	300001	340000	0.000685	0.000742	0.115136	0.0315332
	APICC_05884	Phosphomevalonate kinase	KZ288234.1	300001	340000	0.000685	0.000742	0.115136	0.0315332
	APICC_05883	60S ribosomal protein L29	KZ288234.1	300001	340000	0.000685	0.000742	0.115136	0.0315332
	APICC_02421	Glycerol-3-phosphate acyltransferase	KZ288235.1	320001	360000	0.000115	0.000167	0.534829	0.169433
	APICC_05897	Cytochrome P450	KZ288235.1	320001	360000	0.000115	0.000167	0.534829	0.169433
	APICC_05898	39S ribosomal protein L43	KZ288235.1	320001	360000	0.000115	0.000167	0.534829	0.169433
	APICC_05896	Alcohol dehydrogenase [NADP+] A	KZ288235.1	320001	360000	0.000115	0.000167	0.534829	0.169433
	APICC_08278	hypothetical protein	KZ288235.1	320001	360000	0.000115	0.000167	0.534829	0.169433
	APICC_03604	Alcohol dehydrogenase [NADP+] A	KZ288235.1	320001	360000	0.000115	0.000167	0.534829	0.169433
	APICC_03605	Aldose reductase	KZ288235.1	320001	360000	0.000115	0.000167	0.534829	0.169433
	APICC_02420	hypothetical protein	KZ288235.1	320001	360000	0.000115	0.000167	0.534829	0.169433
	APICC_05895	N(2)%2CN(2)-dimethylguanosine tRNA methyltransferase	KZ288235.1	320001	360000	0.000115	0.000167	0.534829	0.169433
	APICC_02419	hypothetical protein	KZ288235.1	320001	360000	0.000115	0.000167	0.534829	0.169433
	APICC_05899	E3 ubiquitin-protein ligase KCMF1	KZ288235.1	360001	400000	0.000222	0.000276	0.315698	0.180442
	APICC_03609	Putative pre-mRNA-splicing factor ATP-dependent RNA helicase DHX15	KZ288235.1	360001	400000	0.000222	0.000276	0.315698	0.180442
	APICC_02422	TNF receptor-associated factor	KZ288235.1	360001	400000	0.000222	0.000276	0.315698	0.180442
	APICC_03607	Ribose-5-phosphate isomerase	KZ288235.1	360001	400000	0.000222	0.000276	0.315698	0.180442
	APICC_03610	GrpE protein	KZ288235.1	360001	400000	0.000222	0.000276	0.315698	0.180442
	APICC_02423	DNA mismatch repair protein Mlh1	KZ288235.1	360001	400000	0.000222	0.000276	0.315698	0.180442
	APICC_03606	ATP synthase subunit e	KZ288235.1	360001	400000	0.000222	0.000276	0.315698	0.180442
	APICC_03608	Cardioactive peptide	KZ288235.1	360001	400000	0.000222	0.000276	0.315698	0.180442
	APICC_06705	Dihydropteridine reductase	KZ288235.1	360001	400000	0.000222	0.000276	0.315698	0.180442
	APICC_09230	slit 1 protein	KZ288251.1	460001	500000	0.00048	0.000502	0.0661831	0.0323228
	APICC_06062	Leucine-rich repeat neuronal protein	KZ288251.1	460001	500000	0.00048	0.000502	0.0661831	0.0323228
	APICC_08144	N-acetylserotonin O-methyltransferase protein	KZ288251.1	460001	500000	0.00048	0.000502	0.0661831	0.0323228
	APICC_02564	Mitochondrial fission	KZ288251.1	460001	500000	0.00048	0.000502	0.0661831	0.0323228
	APICC_09457	Endocuticle structural glycoprotein SgAbd-1	KZ288251.1	480001	520000	0.000695	0.000758	0.124734	0.0374627
	APICC_08144	N-acetylserotonin O-methyltransferase protein	KZ288251.1	480001	520000	0.000695	0.000758	0.124734	0.0374627
	APICC_02564	Mitochondrial fission	KZ288251.1	480001	520000	0.000695	0.000758	0.124734	0.0374627
	APICC_06063	Endocuticle structural glycoprotein SgAbd-2	KZ288251.1	480001	520000	0.000695	0.000758	0.124734	0.0374627
	APICC_09556	Endocuticle structural glycoprotein SgAbd-2	KZ288251.1	500001	540000	0.000993	0.00102391	0.0441347	0.0345099
	APICC_08145	Endocuticle structural glycoprotein SgAbd-2	KZ288251.1	500001	540000	0.000993	0.00102391	0.0441347	0.0345099
	APICC_09457	Endocuticle structural glycoprotein SgAbd-1	KZ288251.1	500001	540000	0.000993	0.00102391	0.0441347	0.0345099
	APICC_06063	Endocuticle structural glycoprotein SgAbd-2	KZ288251.1	500001	540000	0.000993	0.00102391	0.0441347	0.0345099
	APICC_06096	ER degradation-enhancing alpha-mannosidase	KZ288253.1	1060001	1100000	0.000454	0.000552	0.28225	0.10503
	APICC_09078	BAG family molecular chaperone regulator	KZ288253.1	1060001	1100000	0.000454	0.000552	0.28225	0.10503
	APICC_05777	hypothetical protein	KZ288253.1	1060001	1100000	0.000454	0.000552	0.28225	0.10503
	APICC_02595	tRNA methyltransferase	KZ288253.1	1060001	1100000	0.000454	0.000552	0.28225	0.10503
	APICC_05778	Pro-corazonin	KZ288253.1	1060001	1100000	0.000454	0.000552	0.28225	0.10503
	APICC_02754	Mitogen-activated protein kinase kinase kinase	KZ288259.1	140001	180000	0.000909	0.000967	0.0882952	0.0328932
	APICC_09932	Choline O-acetyltransferase	KZ288259.1	140001	180000	0.000909	0.000967	0.0882952	0.0328932
	APICC_08136	Moesin/ezrin/radixin	KZ288259.1	140001	180000	0.000909	0.000967	0.0882952	0.0328932
	APICC_02754	Mitogen-activated protein kinase kinase kinase	KZ288259.1	160001	200000	0.0004	0.000429	0.100055	0.0571601
	APICC_08136	Moesin/ezrin/radixin	KZ288259.1	160001	200000	0.0004	0.000429	0.100055	0.0571601
	APICC_09445	Titin	KZ288259.1	540001	580000	0.000281	0.000345	0.295114	0.0320429
	APICC_02860	ATP-dependent RNA helicase kurz	KZ288266.1	20001	60000	0.000255	0.000278	0.122079	0.0329801
	APICC_04335	GTP-binding protein Di-Ras2	KZ288266.1	20001	60000	0.000255	0.000278	0.122079	0.0329801
	APICC_02858	10-formyltetrahydrofolate dehydrogenase	KZ288266.1	20001	60000	0.000255	0.000278	0.122079	0.0329801
	APICC_07006	hypothetical protein	KZ288266.1	20001	60000	0.000255	0.000278	0.122079	0.0329801
	APICC_02859	N(4)-(Beta-N-acetylglucosaminyl)-L-asparaginase	KZ288266.1	20001	60000	0.000255	0.000278	0.122079	0.0329801
	APICC_04333	Thioredoxin-related transmembrane protein	KZ288266.1	20001	60000	0.000255	0.000278	0.122079	0.0329801
	APICC_04334	hypothetical protein	KZ288266.1	20001	60000	0.000255	0.000278	0.122079	0.0329801
	APICC_02885	Sorting nexin-30	KZ288266.1	1260001	1300000	0.000159	0.000182	0.199985	0.064594
	APICC_08049	voltage-gated potassium channel subunit beta-1	KZ288266.1	1260001	1300000	0.000159	0.000182	0.199985	0.064594
	APICC_08049	voltage-gated potassium channel subunit beta-1	KZ288266.1	1280001	1320000	0.000278	0.0003	0.108564	0.0584508
	APICC_07020	Pygopus	KZ288266.1	1280001	1320000	0.000278	0.0003	0.108564	0.0584508
	APICC_02894	Cytoplasmic aconitate hydratase	KZ288266.1	2020001	2060000	0.000156	0.00018	0.211465	0.026135
	APICC_09661	Cytoplasmic aconitate hydratase	KZ288266.1	2020001	2060000	0.000156	0.00018	0.211465	0.026135
	APICC_02893	Transferrin	KZ288266.1	2020001	2060000	0.000156	0.00018	0.211465	0.026135
	APICC_06377	S-adenosylmethionine mitochondrial carrier protein	KZ288266.1	2020001	2060000	0.000156	0.00018	0.211465	0.026135
	APICC_02895	hypothetical protein	KZ288266.1	2020001	2060000	0.000156	0.00018	0.211465	0.026135
	APICC_04378	Major facilitator superfamily domain-containing protein	KZ288266.1	2020001	2060000	0.000156	0.00018	0.211465	0.026135
	APICC_04379	F-box/WD repeat-containing protein	KZ288266.1	2020001	2060000	0.000156	0.00018	0.211465	0.026135
	APICC_04380	hypothetical protein	KZ288266.1	2020001	2060000	0.000156	0.00018	0.211465	0.026135
	APICC_02894	Cytoplasmic aconitate hydratase	KZ288266.1	2040001	2080000	0.000109	0.000133	0.288056	0.0362364
	APICC_09661	Cytoplasmic aconitate hydratase	KZ288266.1	2040001	2080000	0.000109	0.000133	0.288056	0.0362364
	APICC_06377	S-adenosylmethionine mitochondrial carrier protein	KZ288266.1	2040001	2080000	0.000109	0.000133	0.288056	0.0362364
	APICC_08548	ATP-dependent DNA helicase	KZ288266.1	2040001	2080000	0.000109	0.000133	0.288056	0.0362364
	APICC_02895	hypothetical protein	KZ288266.1	2040001	2080000	0.000109	0.000133	0.288056	0.0362364
	APICC_07023	Phosphoglycerate mutase	KZ288266.1	2040001	2080000	0.000109	0.000133	0.288056	0.0362364
	APICC_08547	hypothetical protein	KZ288266.1	2040001	2080000	0.000109	0.000133	0.288056	0.0362364
	APICC_02896	Ras-related protein Rab-24	KZ288266.1	2040001	2080000	0.000109	0.000133	0.288056	0.0362364
	APICC_04380	hypothetical protein	KZ288266.1	2040001	2080000	0.000109	0.000133	0.288056	0.0362364
	APICC_02897	Histone RNA hairpin-binding protein	KZ288266.1	2040001	2080000	0.000109	0.000133	0.288056	0.0362364
	APICC_02982	Transmembrane protein	KZ288271.1	20001	60000	0.000183	0.0002	0.128679	0.0564765
	APICC_02981	Ribonucleoside-diphosphate reductase subunit M2	KZ288271.1	20001	60000	0.000183	0.0002	0.128679	0.0564765
	APICC_07411	Cullin-associated NEDD8-dissociated protein	KZ288271.1	20001	60000	0.000183	0.0002	0.128679	0.0564765
	APICC_05248	DDB1- and CUL4-associated factor	KZ288271.1	20001	60000	0.000183	0.0002	0.128679	0.0564765
	APICC_06427	1%2C2-dihydroxy-3-keto-5-methylthiopentene dioxygenase	KZ288271.1	20001	60000	0.000183	0.0002	0.128679	0.0564765
	APICC_01858	MAP kinase-activating death domain protein	KZ288271.1	100001	140000	0.000703	0.000726	0.046061	0.0251082
	APICC_02987	hypothetical protein	KZ288271.1	100001	140000	0.000703	0.000726	0.046061	0.0251082
	APICC_02986	TPR Domain containing protein	KZ288271.1	100001	140000	0.000703	0.000726	0.046061	0.0251082
	APICC_01857	Dehydrogenase/reductase SDR family member	KZ288271.1	100001	140000	0.000703	0.000726	0.046061	0.0251082
	APICC_02985	Dehydrogenase/reductase SDR family member	KZ288271.1	100001	140000	0.000703	0.000726	0.046061	0.0251082
	APICC_05252	Splicing factor%2C arginine/serine-rich	KZ288271.1	100001	140000	0.000703	0.000726	0.046061	0.0251082
	-	-	KZ288275.1	80001	120000	0.00210243	0.00216558	0.0426957	0.027404
	APICC_09733	hypothetical protein	KZ288275.1	100001	140000	0.00192552	0.00204749	0.0886083	0.0393776
	APICC_09733	hypothetical protein	KZ288275.1	120001	160000	0.00211131	0.00235314	0.156449	0.0504132
	APICC_09733	hypothetical protein	KZ288275.1	140001	180000	0.00239927	0.00252731	0.0750071	0.0681458
	APICC_09733	hypothetical protein	KZ288275.1	220001	260000	0.000959	0.0012883	0.425989	0.123494
	-	-	KZ288275.1	240001	280000	0.000171	0.0003	0.809927	0.0884372
	APICC_06502	calcitonin receptor	KZ288279.1	140001	180000	0.00186162	0.00192033	0.0447956	0.0568407
	APICC_03079	UDP-glucuronosyltransferase	KZ288279.1	140001	180000	0.00186162	0.00192033	0.0447956	0.0568407
	APICC_03081	hypothetical protein	KZ288279.1	140001	180000	0.00186162	0.00192033	0.0447956	0.0568407
	APICC_03080	UDP-glucuronosyltransferase	KZ288279.1	140001	180000	0.00186162	0.00192033	0.0447956	0.0568407
	APICC_08142	Ecdysteroid UDP-glucosyltransferase	KZ288279.1	140001	180000	0.00186162	0.00192033	0.0447956	0.0568407
	APICC_09900	Esterase B1	KZ288279.1	140001	180000	0.00186162	0.00192033	0.0447956	0.0568407
	APICC_09900	Esterase B1	KZ288279.1	160001	200000	0.00142791	0.00150565	0.0764814	0.0606885
	APICC_06505	Calcitonin receptor	KZ288279.1	160001	200000	0.00142791	0.00150565	0.0764814	0.0606885
	APICC_03081	hypothetical protein	KZ288279.1	160001	200000	0.00142791	0.00150565	0.0764814	0.0606885
	APICC_08142	Ecdysteroid UDP-glucosyltransferase	KZ288279.1	160001	200000	0.00142791	0.00150565	0.0764814	0.0606885
	APICC_09801	Procollagen-lysine%2C2-oxoglutarate 5-dioxygenase	KZ288280.1	320001	360000	0.000658	0.000705	0.0982506	0.0944589
	APICC_06510	Neuralized protein	KZ288280.1	320001	360000	0.000658	0.000705	0.0982506	0.0944589
	APICC_09456	Procollagen-lysine%2C2-oxoglutarate 5-dioxygenase	KZ288280.1	320001	360000	0.000658	0.000705	0.0982506	0.0944589
	APICC_06512	oxidoreductase yrbE	KZ288280.1	320001	360000	0.000658	0.000705	0.0982506	0.0944589
	APICC_03090	N-acetylglucosaminyl-phosphatidylinositol biosynthetic protein	KZ288280.1	320001	360000	0.000658	0.000705	0.0982506	0.0944589
	APICC_03094	Vacuolar protein sorting-associated protein	KZ288280.1	320001	360000	0.000658	0.000705	0.0982506	0.0944589
	APICC_03091	Guanine nucleotide-binding protein subunit beta-2	KZ288280.1	320001	360000	0.000658	0.000705	0.0982506	0.0944589
	APICC_02780	hypothetical protein	KZ288280.1	320001	360000	0.000658	0.000705	0.0982506	0.0944589
	APICC_03092	Muscle M-line assembly protein unc-89	KZ288280.1	320001	360000	0.000658	0.000705	0.0982506	0.0944589
	APICC_03093	Contactin-5	KZ288280.1	320001	360000	0.000658	0.000705	0.0982506	0.0944589
	APICC_09801	Procollagen-lysine%2C2-oxoglutarate 5-dioxygenase	KZ288280.1	340001	380000	0.00118416	0.00123728	0.063308	0.0561975
	APICC_09456	Procollagen-lysine%2C2-oxoglutarate 5-dioxygenase	KZ288280.1	340001	380000	0.00118416	0.00123728	0.063308	0.0561975
	APICC_02780	hypothetical protein	KZ288280.1	340001	380000	0.00118416	0.00123728	0.063308	0.0561975
	APICC_06512	oxidoreductase yrbE	KZ288280.1	340001	380000	0.00118416	0.00123728	0.063308	0.0561975
	APICC_06277	Pancreas transcription factor	KZ288280.1	340001	380000	0.00118416	0.00123728	0.063308	0.0561975
	APICC_03094	Vacuolar protein sorting-associated protein	KZ288280.1	340001	380000	0.00118416	0.00123728	0.063308	0.0561975
	APICC_03092	Muscle M-line assembly protein unc-89	KZ288280.1	340001	380000	0.00118416	0.00123728	0.063308	0.0561975
	APICC_03093	Contactin-5	KZ288280.1	340001	380000	0.00118416	0.00123728	0.063308	0.0561975
	APICC_10067	hypothetical protein	KZ288280.1	340001	380000	0.00118416	0.00123728	0.063308	0.0561975
	APICC_09465	Heat shock factor protein	KZ288282.1	840001	880000	7.76e-05	0.000142	0.869919	0.0431728
	APICC_05545	Protein pigeon	KZ288282.1	840001	880000	7.76e-05	0.000142	0.869919	0.0431728
	APICC_02086	Poly(U)-specific endoribonuclease	KZ288282.1	840001	880000	7.76e-05	0.000142	0.869919	0.0431728
	APICC_08974	DNA mismatch repair protein Mlh3	KZ288282.1	840001	880000	7.76e-05	0.000142	0.869919	0.0431728
	APICC_03107	Leucine-rich repeat-containing protein	KZ288282.1	840001	880000	7.76e-05	0.000142	0.869919	0.0431728
	APICC_10088	Placental protein	KZ288282.1	840001	880000	7.76e-05	0.000142	0.869919	0.0431728
	APICC_03106	Glyoxalase domain-containing protein	KZ288282.1	840001	880000	7.76e-05	0.000142	0.869919	0.0431728
	APICC_06526	Potassium/sodium hyperpolarization-activated cyclic nucleotide-gated channel	KZ288282.1	840001	880000	7.76e-05	0.000142	0.869919	0.0431728
	APICC_09465	Heat shock factor protein	KZ288282.1	860001	900000	0.000346	0.000376	0.117813	0.0283493
	APICC_08975	Protein spaetzle	KZ288282.1	860001	900000	0.000346	0.000376	0.117813	0.0283493
	APICC_03110	Cell growth regulator with RING finger domain protein	KZ288282.1	860001	900000	0.000346	0.000376	0.117813	0.0283493
	APICC_03107	Leucine-rich repeat-containing protein	KZ288282.1	860001	900000	0.000346	0.000376	0.117813	0.0283493
	APICC_06526	Potassium/sodium hyperpolarization-activated cyclic nucleotide-gated channel	KZ288282.1	860001	900000	0.000346	0.000376	0.117813	0.0283493
	APICC_03109	hypothetical protein	KZ288282.1	860001	900000	0.000346	0.000376	0.117813	0.0283493
	APICC_03108	hypothetical protein	KZ288282.1	860001	900000	0.000346	0.000376	0.117813	0.0283493
	APICC_05546	Ninjurin-1	KZ288282.1	860001	900000	0.000346	0.000376	0.117813	0.0283493
	APICC_07546	small effector protein	KZ288282.1	860001	900000	0.000346	0.000376	0.117813	0.0283493
	APICC_03285	hypothetical protein	KZ288285.1	1	40000	0.000858	0.00112471	0.391228	0.025165
	APICC_03286	hypothetical protein	KZ288285.1	1	40000	0.000858	0.00112471	0.391228	0.025165
	APICC_08575	Putative transcription factor capicua	KZ288292.1	220001	260000	9.92e-05	0.000102	0.0457586	0.0258714
	APICC_03398	Centrosomal protein of	KZ288292.1	220001	260000	9.92e-05	0.000102	0.0457586	0.0258714
	APICC_00217	GRIP and coiled-coil domain-containing protein	KZ288292.1	220001	260000	9.92e-05	0.000102	0.0457586	0.0258714
	APICC_07053	GRIP and coiled-coil domain-containing protein	KZ288292.1	220001	260000	9.92e-05	0.000102	0.0457586	0.0258714
	APICC_00218	D-tyrosyl-tRNA(Tyr) deacylase	KZ288292.1	220001	260000	9.92e-05	0.000102	0.0457586	0.0258714
	APICC_09629	ATP-dependent RNA helicase	KZ288292.1	320001	360000	0.000145	0.000176	0.277656	0.0356598
	APICC_00221	WD repeat-containing protein	KZ288292.1	320001	360000	0.000145	0.000176	0.277656	0.0356598
	APICC_07054	UV radiation resistance-associated gene protein	KZ288292.1	320001	360000	0.000145	0.000176	0.277656	0.0356598
	APICC_00223	hypothetical protein	KZ288292.1	320001	360000	0.000145	0.000176	0.277656	0.0356598
	-	-	KZ288292.1	1240001	1280000	0.000271	0.000281	0.0536771	0.0307815
	APICC_03414	Protein cubitus interruptus	KZ288292.1	1280001	1320000	0.00029	0.000362	0.323518	0.0395897
	APICC_03414	Protein cubitus interruptus	KZ288292.1	1300001	1340000	0.000292	0.000492	0.755599	0.0638878
	APICC_00235	hypothetical protein	KZ288292.1	1300001	1340000	0.000292	0.000492	0.755599	0.0638878
	APICC_00235	hypothetical protein	KZ288292.1	1320001	1360000	0.000158	0.00037	1.22586	0.0742217
	APICC_09665	hypothetical protein	KZ288292.1	1320001	1360000	0.000158	0.00037	1.22586	0.0742217
	APICC_09665	hypothetical protein	KZ288292.1	1340001	1380000	0.000125	0.000246	0.9753	0.0437359
	-	-	KZ288293.1	1020001	1060000	6.53e-05	0.000129	0.982133	0.0456496
	-	-	KZ288293.1	1040001	1080000	6.88e-05	0.000128	0.894372	0.0441026
	APICC_03443	Zinc finger MYND domain-containing protein	KZ288293.1	1640001	1680000	0.000572	0.000605	0.0824887	0.0279257
	APICC_00266	Sodium- and chloride-dependent GABA transporter	KZ288293.1	1640001	1680000	0.000572	0.000605	0.0824887	0.0279257
	APICC_03442	TRAF-interacting protein	KZ288293.1	1640001	1680000	0.000572	0.000605	0.0824887	0.0279257
	APICC_00367	40S ribosomal protein S12	KZ288293.1	1640001	1680000	0.000572	0.000605	0.0824887	0.0279257
	APICC_00265	Placental protein	KZ288293.1	1640001	1680000	0.000572	0.000605	0.0824887	0.0279257
	APICC_03444	Male-enhanced antigen	KZ288293.1	1640001	1680000	0.000572	0.000605	0.0824887	0.0279257
	APICC_06690	DNA-binding protein D-ETS-6	KZ288293.1	1640001	1680000	0.000572	0.000605	0.0824887	0.0279257
	APICC_02426	Dynein heavy chain 3%2C axonemal	KZ288301.1	640001	680000	0.000666	0.000715	0.102792	0.0344021
	APICC_03558	Zinc transporter	KZ288301.1	640001	680000	0.000666	0.000715	0.102792	0.0344021
	APICC_00347	Vacuolar protein sorting-associated protein	KZ288301.1	640001	680000	0.000666	0.000715	0.102792	0.0344021
	APICC_03559	Trans-1%2C2-dihydrobenzene-1%2C2-diol dehydrogenase	KZ288301.1	640001	680000	0.000666	0.000715	0.102792	0.0344021
	APICC_02426	Dynein heavy chain 3%2C axonemal	KZ288301.1	660001	700000	0.000637	0.000683	0.0994267	0.0368883
	APICC_03560	Transitional endoplasmic reticulum ATPase TER94	KZ288301.1	660001	700000	0.000637	0.000683	0.0994267	0.0368883
	APICC_03559	Trans-1%2C2-dihydrobenzene-1%2C2-diol dehydrogenase	KZ288301.1	660001	700000	0.000637	0.000683	0.0994267	0.0368883
	APICC_07729	Leptin receptor overlapping transcript	KZ288301.1	660001	700000	0.000637	0.000683	0.0994267	0.0368883
	APICC_00374	Leucine-rich repeat-containing protein	KZ288305.1	360001	400000	0.000481	0.000527	0.132241	0.0272301
	APICC_03511	DNA ligase	KZ288305.1	360001	400000	0.000481	0.000527	0.132241	0.0272301
	APICC_03597	Serologically defined colon cancer antigen	KZ288305.1	360001	400000	0.000481	0.000527	0.132241	0.0272301
	APICC_00375	Nucleosomal histone kinase	KZ288305.1	360001	400000	0.000481	0.000527	0.132241	0.0272301
	APICC_03515	Microtubule-associated serine/threonine-protein kinase	KZ288305.1	360001	400000	0.000481	0.000527	0.132241	0.0272301
	APICC_03595	Endochitinase	KZ288305.1	360001	400000	0.000481	0.000527	0.132241	0.0272301
	APICC_03596	40S ribosomal protein S16	KZ288305.1	360001	400000	0.000481	0.000527	0.132241	0.0272301
	APICC_03512	Doublesex- and mab-3-related transcription factor A2	KZ288305.1	360001	400000	0.000481	0.000527	0.132241	0.0272301
	APICC_03594	39S ribosomal protein L54	KZ288305.1	360001	400000	0.000481	0.000527	0.132241	0.0272301
	APICC_03661	mRNA turnover protein	KZ288310.1	1040001	1080000	0.000736	0.000797	0.115428	0.0274688
	APICC_00436	Phosphatidate phosphatase LPIN2	KZ288310.1	1040001	1080000	0.000736	0.000797	0.115428	0.0274688
	APICC_09108	keratin%2C type II cytoskeletal 1-like	KZ288310.1	1040001	1080000	0.000736	0.000797	0.115428	0.0274688
	APICC_09107	mRNA turnover protein	KZ288310.1	1040001	1080000	0.000736	0.000797	0.115428	0.0274688
	APICC_09575	Ras-related protein Rab-31	KZ288312.1	220001	260000	0.000867	0.000901	0.0557503	0.0250939
	APICC_00477	Myosin-2 essential light chain	KZ288312.1	220001	260000	0.000867	0.000901	0.0557503	0.0250939
	APICC_00478	WD repeat%2C SAM and U-box domain-containing protein	KZ288312.1	220001	260000	0.000867	0.000901	0.0557503	0.0250939
	APICC_03715	Pogo transposable element with ZNF domain	KZ288312.1	220001	260000	0.000867	0.000901	0.0557503	0.0250939
	APICC_08324	Endothelin-converting enzyme	KZ288317.1	300001	340000	0.000784	0.000856	0.127287	0.0693911
	APICC_06771	Abhydrolase domain-containing protein	KZ288317.1	300001	340000	0.000784	0.000856	0.127287	0.0693911
	APICC_00721	Abhydrolase domain-containing protein	KZ288317.1	300001	340000	0.000784	0.000856	0.127287	0.0693911
	APICC_00534	Structural maintenance of chromosomes protein	KZ288317.1	300001	340000	0.000784	0.000856	0.127287	0.0693911
	APICC_06868	Adenosine deaminase CECR1-A	KZ288317.1	300001	340000	0.000784	0.000856	0.127287	0.0693911
	APICC_06867	Segment polarity protein dishevelled DVL-1	KZ288317.1	300001	340000	0.000784	0.000856	0.127287	0.0693911
	APICC_09904	Segment polarity protein dishevelled protein DVL-3	KZ288317.1	300001	340000	0.000784	0.000856	0.127287	0.0693911
	APICC_03791	hypothetical protein	KZ288317.1	300001	340000	0.000784	0.000856	0.127287	0.0693911
	APICC_00648	DNA primase large subunit	KZ288326.1	320001	360000	0.000531	0.000553	0.0592678	0.0391647
	APICC_06823	Insulin growth factor-binding protein complex acid labile subunit	KZ288326.1	320001	360000	0.000531	0.000553	0.0592678	0.0391647
	APICC_09646	Cysteine dioxygenase type	KZ288326.1	320001	360000	0.000531	0.000553	0.0592678	0.0391647
	APICC_03909	L-threonine 3-dehydrogenase	KZ288326.1	320001	360000	0.000531	0.000553	0.0592678	0.0391647
	APICC_06777	hypothetical protein	KZ288326.1	320001	360000	0.000531	0.000553	0.0592678	0.0391647
	APICC_06877	RNA polymerase II subunit	KZ288335.1	140001	180000	0.00104059	0.00106916	0.039076	0.0274366
	APICC_03993	MPN domain-containing protein	KZ288335.1	140001	180000	0.00104059	0.00106916	0.039076	0.0274366
	APICC_03994	Cysteine desulfurase	KZ288335.1	140001	180000	0.00104059	0.00106916	0.039076	0.0274366
	APICC_04019	COP9 signalosome complex subunit	KZ288335.1	140001	180000	0.00104059	0.00106916	0.039076	0.0274366
	APICC_00713	GTP-binding protein ypt7	KZ288335.1	140001	180000	0.00104059	0.00106916	0.039076	0.0274366
	APICC_03992	28S ribosomal protein S17	KZ288335.1	140001	180000	0.00104059	0.00106916	0.039076	0.0274366
	APICC_04023	Neogenin	KZ288340.1	180001	220000	0.000253	0.000266	0.0700887	0.0252249
	APICC_04022	Serine/threonine-protein kinase atr	KZ288340.1	180001	220000	0.000253	0.000266	0.0700887	0.0252249
	APICC_04021	hypothetical protein	KZ288340.1	180001	220000	0.000253	0.000266	0.0700887	0.0252249
	APICC_00738	Serine/threonine-protein phosphatase 6 regulatory ankyrin repeat subunit A	KZ288340.1	180001	220000	0.000253	0.000266	0.0700887	0.0252249
	APICC_04020	Primary ciliary dyskinesia protein	KZ288340.1	180001	220000	0.000253	0.000266	0.0700887	0.0252249
	APICC_00740	Odorant receptor Or2	KZ288340.1	180001	220000	0.000253	0.000266	0.0700887	0.0252249
	APICC_00741	ActinA	KZ288340.1	180001	220000	0.000253	0.000266	0.0700887	0.0252249
	APICC_00739	High mobility group protein	KZ288340.1	180001	220000	0.000253	0.000266	0.0700887	0.0252249
	-	-	KZ288346.1	1	40000	0.000341	0.000452	0.407962	0.254634
	-	-	KZ288346.1	20001	60000	0.000213	0.000281	0.403566	0.314811
	-	-	KZ288346.1	40001	80000	0.000268	0.000356	0.407805	0.236289
	-	-	KZ288346.1	60001	100000	0.000899	0.000947	0.0753617	0.071161
	-	-	KZ288347.1	1540001	1580000	0.000146	0.000183	0.324134	0.046312
	-	-	KZ288352.1	20001	60000	0.000296	0.00035	0.243787	0.0504357
	-	-	KZ288352.1	40001	80000	0.000702	0.000784	0.158782	0.0471206
	-	-	KZ288352.1	60001	100000	0.000907	0.00096	0.0824172	0.0345223
	-	-	KZ288352.1	220001	260000	0.000623	0.000691	0.14923	0.027607
	-	-	KZ288353.1	40001	80000	9.9e-05	0.000129	0.386843	0.0595505
	APICC_04215	hypothetical protein	KZ288353.1	60001	100000	0.000143	0.000152	0.0893662	0.0659762
	APICC_07646	Set1/Ash2 histone methyltransferase complex subunit ASH2	KZ288353.1	60001	100000	0.000143	0.000152	0.0893662	0.0659762
	APICC_04216	bolA protein	KZ288353.1	60001	100000	0.000143	0.000152	0.0893662	0.0659762
	APICC_04217	Lipid storage droplets surface-binding protein	KZ288353.1	240001	280000	0.000232	0.000255	0.135674	0.0299868
	APICC_00909	hypothetical protein	KZ288353.1	240001	280000	0.000232	0.000255	0.135674	0.0299868
	APICC_05709	Lipid storage droplets surface-binding protein	KZ288353.1	240001	280000	0.000232	0.000255	0.135674	0.0299868
	APICC_04218	Lipid storage droplets surface-binding protein	KZ288353.1	240001	280000	0.000232	0.000255	0.135674	0.0299868
	APICC_04219	Lipid storage droplets surface-binding protein	KZ288353.1	240001	280000	0.000232	0.000255	0.135674	0.0299868
	APICC_07647	SAM and SH3 domain-containing protein	KZ288353.1	260001	300000	0.000418	0.000574	0.457334	0.0548181
	APICC_05709	Lipid storage droplets surface-binding protein	KZ288353.1	260001	300000	0.000418	0.000574	0.457334	0.0548181
	APICC_04218	Lipid storage droplets surface-binding protein	KZ288353.1	260001	300000	0.000418	0.000574	0.457334	0.0548181
	APICC_04219	Lipid storage droplets surface-binding protein	KZ288353.1	260001	300000	0.000418	0.000574	0.457334	0.0548181
	APICC_07647	SAM and SH3 domain-containing protein	KZ288353.1	280001	320000	0.000739	0.000949	0.361616	0.0494724
	APICC_07647	SAM and SH3 domain-containing protein	KZ288353.1	300001	340000	0.000926	0.00102857	0.151	0.025218
	-	-	KZ288353.1	340001	380000	0.00086	0.000929	0.112149	0.0743564
	APICC_07648	sterile alpha motif domain-containing protein	KZ288353.1	360001	400000	0.00113158	0.00120079	0.0856453	0.0563003
	-	-	KZ288353.1	480001	520000	0.000702	0.000768	0.130978	0.0379262
	-	-	KZ288353.1	500001	540000	0.000614	0.000669	0.123849	0.0402575
	-	-	KZ288353.1	620001	660000	0.000309	0.000352	0.190344	0.0295531
	-	-	KZ288353.1	640001	680000	0.000303	0.000349	0.20546	0.030622
	-	-	KZ288353.1	660001	700000	0.000461	0.000482	0.0627443	0.0299177
	APICC_04240	S phase cyclin A-associated protein in the endoplasmic reticulum	KZ288354.1	360001	400000	0.000159	0.000171	0.104529	0.0370757
	-	-	KZ288354.1	380001	420000	0.000153	0.000184	0.265779	0.0356288
	-	-	KZ288354.1	420001	460000	0.000178	0.000206	0.215836	0.0472008
	-	-	KZ288354.1	440001	480000	0.000152	0.000189	0.317489	0.0731415
	-	-	KZ288354.1	840001	880000	0.000191	0.000215	0.168141	0.133382
	APICC_04242	Lipopolysaccharide-induced tumor necrosis factor-alpha factor	KZ288354.1	1200001	1240000	6.65e-05	0.00018	1.4338	0.139066
	APICC_04242	Lipopolysaccharide-induced tumor necrosis factor-alpha factor	KZ288354.1	1220001	1260000	0.000107	0.000211	0.985959	0.165098
	APICC_04242	Lipopolysaccharide-induced tumor necrosis factor-alpha factor	KZ288354.1	1240001	1280000	0.000191	0.000281	0.557943	0.140342
	APICC_04243	Sulfur controller	KZ288354.1	1240001	1280000	0.000191	0.000281	0.557943	0.140342
	APICC_04243	Sulfur controller	KZ288354.1	1260001	1300000	0.000293	0.000427	0.546113	0.118058
	-	-	KZ288354.1	1280001	1320000	0.000406	0.000478	0.238325	0.0701588
	-	-	KZ288354.1	1320001	1360000	0.000412	0.000423	0.0390126	0.0394261
	-	-	KZ288354.1	1340001	1380000	0.000547	0.000606	0.14822	0.040487
	APICC_00931	hypothetical protein	KZ288354.1	1360001	1400000	0.000626	0.000812	0.37562	0.0584878
	APICC_00931	hypothetical protein	KZ288354.1	1380001	1420000	0.000508	0.000679	0.416917	0.0718068
	-	-	KZ288354.1	1400001	1440000	0.000686	0.000861	0.327338	0.0536947
	-	-	KZ288354.1	1420001	1460000	0.000898	0.00101429	0.175	0.0412047
	APICC_08709	Chitin synthase	KZ288355.1	160001	200000	0.000976	0.00109337	0.163091	0.0258278
	APICC_04253	Chitin synthase	KZ288355.1	160001	200000	0.000976	0.00109337	0.163091	0.0258278
	APICC_00957	hypothetical protein	KZ288357.1	680001	720000	0.00019	0.000214	0.171302	0.0255297
	APICC_00957	hypothetical protein	KZ288357.1	700001	740000	0.000183	0.000211	0.20357	0.033243
	APICC_00958	Progestin and adipoQ receptor family member	KZ288357.1	720001	760000	0.000115	0.000119	0.0488631	0.0284685
	APICC_08663	Serine/threonine-protein kinase Doa	KZ288357.1	720001	760000	0.000115	0.000119	0.0488631	0.0284685
	APICC_08662	F-box only protein	KZ288357.1	720001	760000	0.000115	0.000119	0.0488631	0.0284685
	APICC_04317	Nucleoporin p58/p45	KZ288360.1	360001	400000	0.000123	0.000156	0.345753	0.0490924
	APICC_00988	hypothetical protein	KZ288360.1	360001	400000	0.000123	0.000156	0.345753	0.0490924
	APICC_08950	hypothetical protein	KZ288364.1	1240001	1280000	0.000631	0.000663	0.0702642	0.0626589
	-	-	KZ288364.1	1260001	1300000	0.00074	0.000759	0.0374146	0.0356036
	APICC_04406	hypothetical protein	KZ288364.1	1280001	1320000	0.000717	0.000792	0.142189	0.0388964
	APICC_01061	major allergen Bla g	KZ288364.1	1280001	1320000	0.000717	0.000792	0.142189	0.0388964
	APICC_04406	hypothetical protein	KZ288364.1	1300001	1340000	0.000286	0.000376	0.397517	0.0699413
	APICC_01063	hypothetical protein	KZ288364.1	1300001	1340000	0.000286	0.000376	0.397517	0.0699413
	APICC_01061	major allergen Bla g	KZ288364.1	1300001	1340000	0.000286	0.000376	0.397517	0.0699413
	APICC_01062	hypothetical protein	KZ288364.1	1300001	1340000	0.000286	0.000376	0.397517	0.0699413
	APICC_01063	hypothetical protein	KZ288364.1	1320001	1360000	0.000115	0.000123	0.0948612	0.0568973
	APICC_01064	hypothetical protein	KZ288364.1	1320001	1360000	0.000115	0.000123	0.0948612	0.0568973
	APICC_01062	hypothetical protein	KZ288364.1	1320001	1360000	0.000115	0.000123	0.0948612	0.0568973
	-	-	KZ288364.1	1540001	1580000	0.000704	0.000813	0.207804	0.0461032
	APICC_04407	hypothetical protein	KZ288364.1	1560001	1600000	0.000675	0.000793	0.232751	0.0539766
	APICC_00669	Mitogen-activated protein kinase	KZ288369.1	120001	160000	0.000105	0.000119	0.177029	0.0417916
	APICC_01083	Endoplasmic reticulum metallopeptidase	KZ288369.1	120001	160000	0.000105	0.000119	0.177029	0.0417916
	APICC_01085	2-amino-3-ketobutyrate coenzyme A ligase	KZ288369.1	120001	160000	0.000105	0.000119	0.177029	0.0417916
	APICC_09501	hypothetical protein	KZ288369.1	120001	160000	0.000105	0.000119	0.177029	0.0417916
	APICC_03940	Trimeric intracellular cation channel type B	KZ288369.1	120001	160000	0.000105	0.000119	0.177029	0.0417916
	APICC_03942	PHD finger and CXXC domain-containing protein CG17446	KZ288369.1	120001	160000	0.000105	0.000119	0.177029	0.0417916
	APICC_01084	hypothetical protein	KZ288369.1	120001	160000	0.000105	0.000119	0.177029	0.0417916
	APICC_03941	ATPase ASNA1	KZ288369.1	120001	160000	0.000105	0.000119	0.177029	0.0417916
	APICC_01086	Plasma membrane calcium-transporting ATPase	KZ288369.1	200001	240000	0.000459	0.000481	0.0695557	0.0354647
	APICC_00673	Aldehyde oxidase	KZ288369.1	200001	240000	0.000459	0.000481	0.0695557	0.0354647
	APICC_04424	Polyadenylate-binding protein-interacting protein	KZ288369.1	360001	400000	0.000169	0.000182	0.110293	0.0310185
	APICC_01092	E3 ubiquitin-protein ligase MIB2	KZ288369.1	360001	400000	0.000169	0.000182	0.110293	0.0310185
	APICC_07047	Protein slit	KZ288369.1	360001	400000	0.000169	0.000182	0.110293	0.0310185
	APICC_04425	Leucine-rich repeat-containing protein	KZ288369.1	360001	400000	0.000169	0.000182	0.110293	0.0310185
	APICC_03953	Serine/threonine-protein kinase PINK1	KZ288369.1	360001	400000	0.000169	0.000182	0.110293	0.0310185
	APICC_01093	TPPP family protein	KZ288369.1	360001	400000	0.000169	0.000182	0.110293	0.0310185
	APICC_04426	Cytospin-A	KZ288369.1	380001	420000	0.000173	0.000182	0.073685	0.0291352
	APICC_07047	Protein slit	KZ288369.1	380001	420000	0.000173	0.000182	0.073685	0.0291352
	APICC_04425	Leucine-rich repeat-containing protein	KZ288369.1	380001	420000	0.000173	0.000182	0.073685	0.0291352
	APICC_03953	Serine/threonine-protein kinase PINK1	KZ288369.1	380001	420000	0.000173	0.000182	0.073685	0.0291352
	APICC_01093	TPPP family protein	KZ288369.1	380001	420000	0.000173	0.000182	0.073685	0.0291352
	-	-	KZ288396.1	1	40000	0.000117	0.000163	0.482452	0.0555734
	-	-	KZ288396.1	20001	60000	9.15e-05	0.000127	0.466643	0.0575761
	-	-	KZ288396.1	80001	120000	0.000241	0.000408	0.760935	0.0398919
	-	-	KZ288396.1	100001	140000	0.000174	0.000328	0.911429	0.0517299
	-	-	KZ288396.1	120001	160000	7.47e-05	0.000125	0.742467	0.0392759
	-	-	KZ288402.1	300001	340000	0.000423	0.000586	0.470765	0.0879572
	-	-	KZ288402.1	360001	400000	0.000267	0.000346	0.37691	0.120527
	-	-	KZ288402.1	380001	420000	0.000308	0.000331	0.103112	0.246444
	APICC_08517	Pyruvate dehydrogenase E1 component subunit alpha	KZ288403.1	200001	240000	0.000156	0.000165	0.0836985	0.0754955
	APICC_08518	Src kinase-associated phosphoprotein	KZ288403.1	200001	240000	0.000156	0.000165	0.0836985	0.0754955
	APICC_08701	Transcription factor	KZ288403.1	200001	240000	0.000156	0.000165	0.0836985	0.0754955
	APICC_04300	Transcription factor	KZ288403.1	200001	240000	0.000156	0.000165	0.0836985	0.0754955
	APICC_01435	Actin-related protein	KZ288403.1	200001	240000	0.000156	0.000165	0.0836985	0.0754955
	APICC_06992	Glycosyltransferase 25 family member	KZ288403.1	200001	240000	0.000156	0.000165	0.0836985	0.0754955
	APICC_01434	Leucine-rich repeat-containing protein	KZ288403.1	200001	240000	0.000156	0.000165	0.0836985	0.0754955
	APICC_04781	Alpha-parvin	KZ288403.1	200001	240000	0.000156	0.000165	0.0836985	0.0754955
	APICC_08516	Kinesin protein KIF18A	KZ288403.1	200001	240000	0.000156	0.000165	0.0836985	0.0754955
	APICC_01433	28S ribosomal protein S35	KZ288403.1	200001	240000	0.000156	0.000165	0.0836985	0.0754955
	APICC_04782	hypothetical protein	KZ288403.1	200001	240000	0.000156	0.000165	0.0836985	0.0754955
	-	-	KZ288406.1	240001	280000	0.000165	0.000206	0.325889	0.0259439
	APICC_07266	Organic cation transporter	KZ288431.1	1	40000	0.000175	0.000184	0.0702471	0.0262574
	APICC_04988	hypothetical protein	KZ288433.1	80001	120000	0.000208	0.000229	0.141442	0.0954043
	-	-	KZ288436.1	20001	60000	0.000284	0.000301	0.081528	0.185137
	-	-	KZ288440.1	1	40000	0.000206	0.000327	0.666513	0.236705
	-	-	KZ288440.1	20001	60000	0.000427	0.000588	0.463448	0.287238
	-	-	KZ288440.1	40001	80000	0.000339	0.000483	0.510436	0.322622
	-	-	KZ288440.1	60001	100000	0.000133	0.000189	0.506957	0.312519
	-	-	KZ288454.1	1	40000	0.000194	0.0002	0.0466681	0.183229
	-	-	KZ288456.1	40001	80000	0.000126	0.000153	0.281766	0.0497033
	-	-	KZ288462.1	160001	200000	0.000254	0.000285	0.169075	0.101743
	-	-	KZ288462.1	180001	220000	0.000234	0.000278	0.249523	0.0922319
	APICC_01759	Protein winged eye	KZ288462.1	380001	420000	0.000104	0.000131	0.336087	0.0667952
	APICC_01759	Protein winged eye	KZ288462.1	400001	440000	0.000148	0.000173	0.229688	0.0694928
	APICC_01760	hypothetical protein	KZ288462.1	560001	600000	8.34e-05	0.000141	0.756006	0.0807619
	-	-	KZ288469.1	40001	80000	0.000969	0.00122961	0.343607	0.0369336
	-	-	KZ288469.1	60001	100000	0.000269	0.00033	0.295629	0.0418777
	APICC_07375	hypothetical protein	KZ288471.1	20001	60000	0.000384	0.000402	0.0671866	0.0478357
	APICC_07375	hypothetical protein	KZ288471.1	40001	80000	0.000814	0.000835	0.0358907	0.0353349
	APICC_07212	hypothetical protein	KZ288472.1	160001	200000	0.00132533	0.00138487	0.0633989	0.0539793
	-	-	KZ288479.1	80001	120000	0.000107	0.000159	0.575828	0.0257723
	APICC_07406	Zinc finger protein	KZ288480.1	20001	60000	8.37e-05	0.000171	1.02668	0.278618
	-	-	KZ288480.1	380001	420000	5.58e-05	8.78e-05	0.653739	0.195003
	-	-	KZ288480.1	400001	440000	8.14e-05	0.000129	0.661318	0.22534
	-	-	KZ288480.1	420001	460000	6.41e-05	8.77e-05	0.451102	0.212623
	-	-	KZ288480.1	440001	480000	0.000137	0.000251	0.874368	0.240573
	-	-	KZ288480.1	460001	500000	0.000209	0.000375	0.844212	0.245884
	-	-	KZ288480.1	480001	520000	0.000124	0.000193	0.647011	0.242909
	APICC_07445	Farnesyl pyrophosphate synthase	KZ288493.1	1	40000	0.000572	0.000661	0.209699	0.0802689
	-	-	KZ288509.1	1	40000	0.000137	0.000146	0.0875006	0.0497908
	-	-	KZ288509.1	20001	60000	0.000121	0.000129	0.0927165	0.0531396
	APICC_07487	Farnesyl pyrophosphate synthase	KZ288520.1	1	40000	0.000192	0.00023	0.262483	0.3437
	APICC_07487	Farnesyl pyrophosphate synthase	KZ288520.1	20001	60000	0.00014	0.000171	0.294374	0.364566
	APICC_07476	Farnesyl pyrophosphate synthase	KZ288605.1	1	40000	0.000706	0.000753	0.0947625	0.0409908

## Sheet: Supplementary Table 6
	Supplementary Table 6 Summary of significantly enriched GO terms (P < 0.05).
	ID	ONTOLOGY	Description	GeneRatio	BgRatio	Pvalue	Count	geneID
	GO:0051188	biological process	obsolete cofactor biosynthetic process	17/263	165/7047	0.000130832	17	APICC_02858/APICC_02894/APICC_03604/APICC_03605/APICC_03986/APICC_03994/APICC_05501/APICC_05802/APICC_05835/APICC_05896/APICC_06705/APICC_07023/APICC_07966/APICC_08688/APICC_08898/APICC_09264/APICC_09661
	GO:0055021	biological process	regulation of cardiac muscle tissue growth	7/263	32/7047	0.000140544	7	APICC_00669/APICC_02110/APICC_02172/APICC_03414/APICC_05835/APICC_06877/APICC_07476
	GO:0005198	molecular function	structural molecule activity	30/227	407/6151	0.000184919	30	APICC_00367/APICC_00477/APICC_00741/APICC_01417/APICC_01433/APICC_01435/APICC_02050/APICC_02111/APICC_02405/APICC_03594/APICC_03596/APICC_03661/APICC_03992/APICC_04317/APICC_04589/APICC_04590/APICC_04967/APICC_05883/APICC_05898/APICC_06867/APICC_07546/APICC_07647/APICC_08136/APICC_08145/APICC_09066/APICC_09107/APICC_09445/APICC_09481/APICC_09556/APICC_09904
	GO:0006081	biological process	cellular aldehyde metabolic process	8/263	46/7047	0.000257193	8	APICC_00673/APICC_03106/APICC_03604/APICC_03605/APICC_03607/APICC_03608/APICC_05835/APICC_05896
	GO:0051186	biological process	obsolete cofactor metabolic process	25/263	327/7047	0.000476666	25	APICC_00673/APICC_02858/APICC_02894/APICC_02979/APICC_03079/APICC_03560/APICC_03604/APICC_03605/APICC_03607/APICC_03608/APICC_03986/APICC_03994/APICC_05501/APICC_05802/APICC_05835/APICC_05896/APICC_06705/APICC_07023/APICC_07966/APICC_08049/APICC_08142/APICC_08688/APICC_08898/APICC_09264/APICC_09661
	GO:0061982	biological process	meiosis I cell cycle process	13/263	120/7047	0.000499462	13	APICC_00375/APICC_00534/APICC_01418/APICC_02050/APICC_02198/APICC_02423/APICC_03515/APICC_04022/APICC_08516/APICC_08663/APICC_08974/APICC_09505/APICC_09650
	GO:0030316	biological process	osteoclast differentiation	5/263	19/7047	0.000526921	5	APICC_00669/APICC_02894/APICC_06502/APICC_06505/APICC_09661
	GO:0060420	biological process	regulation of heart growth	7/263	41/7047	0.0007044	7	APICC_00669/APICC_02110/APICC_02172/APICC_03414/APICC_05835/APICC_06877/APICC_07476
	GO:0004033	molecular function	aldo-keto reductase (NADP) activity	4/227	12/6151	0.000707775	4	APICC_03604/APICC_03605/APICC_05896/APICC_08049
	GO:0040003	biological process	chitin-based cuticle development	10/263	80/7047	0.000724614	10	APICC_02050/APICC_03267/APICC_03595/APICC_04253/APICC_04640/APICC_05503/APICC_08145/APICC_08709/APICC_09066/APICC_09556
	GO:0005996	biological process	monosaccharide metabolic process	13/263	126/7047	0.000797763	13	APICC_00669/APICC_03079/APICC_03559/APICC_03604/APICC_03605/APICC_03607/APICC_03608/APICC_05835/APICC_05896/APICC_07023/APICC_08142/APICC_08898/APICC_09264
	GO:0046364	biological process	monosaccharide biosynthetic process	7/263	42/7047	0.000818799	7	APICC_03604/APICC_03605/APICC_05835/APICC_05896/APICC_07023/APICC_08898/APICC_09264
	GO:0072524	biological process	pyridine-containing compound metabolic process	11/263	96/7047	0.000838456	11	APICC_00673/APICC_03560/APICC_03607/APICC_03608/APICC_05835/APICC_07023/APICC_07966/APICC_08049/APICC_08688/APICC_08898/APICC_09264
	GO:0009108	biological process	obsolete coenzyme biosynthetic process	13/263	127/7047	0.000859729	13	APICC_02858/APICC_03604/APICC_03605/APICC_03986/APICC_05802/APICC_05835/APICC_05896/APICC_06705/APICC_07023/APICC_07966/APICC_08688/APICC_08898/APICC_09264
	GO:0007131	biological process	reciprocal meiotic recombination	7/263	43/7047	0.000947387	7	APICC_00534/APICC_01418/APICC_02198/APICC_02423/APICC_04022/APICC_08974/APICC_09650
	GO:0035825	biological process	homologous recombination	7/263	43/7047	0.000947387	7	APICC_00534/APICC_01418/APICC_02198/APICC_02423/APICC_04022/APICC_08974/APICC_09650
	GO:0019321	biological process	pentose metabolic process	4/263	13/7047	0.00103841	4	APICC_03559/APICC_03607/APICC_03608/APICC_05835
	GO:0051187	biological process	obsolete cofactor catabolic process	5/263	22/7047	0.00108859	5	APICC_02858/APICC_02979/APICC_03079/APICC_03560/APICC_08142
	GO:0006733	biological process	obsolete oxidoreduction coenzyme metabolic process	11/263	100/7047	0.00118055	11	APICC_03560/APICC_03607/APICC_03608/APICC_05802/APICC_05835/APICC_07023/APICC_07966/APICC_08049/APICC_08688/APICC_08898/APICC_09264
	GO:0008194	molecular function	UDP-glycosyltransferase activity	8/227	58/6151	0.00118323	8	APICC_03079/APICC_03080/APICC_03090/APICC_04253/APICC_06992/APICC_08142/APICC_08709/APICC_09801
	GO:0019362	biological process	pyridine nucleotide metabolic process	10/263	86/7047	0.00128065	10	APICC_03560/APICC_03607/APICC_03608/APICC_05835/APICC_07023/APICC_07966/APICC_08049/APICC_08688/APICC_08898/APICC_09264
	GO:0046496	biological process	nicotinamide nucleotide metabolic process	10/263	86/7047	0.00128065	10	APICC_03560/APICC_03607/APICC_03608/APICC_05835/APICC_07023/APICC_07966/APICC_08049/APICC_08688/APICC_08898/APICC_09264
	GO:0008083	molecular function	growth factor activity	4/227	14/6151	0.00135019	4	APICC_00265/APICC_06868/APICC_08975/APICC_10088
	GO:0048285	biological process	organelle fission	24/263	332/7047	0.00135768	24	APICC_00281/APICC_00375/APICC_00436/APICC_00534/APICC_01418/APICC_02050/APICC_02172/APICC_02198/APICC_02249/APICC_02423/APICC_02564/APICC_02897/APICC_03515/APICC_03715/APICC_03953/APICC_04022/APICC_06877/APICC_08516/APICC_08770/APICC_08974/APICC_09042/APICC_09445/APICC_09465/APICC_09650
	GO:0010614	biological process	negative regulation of cardiac muscle hypertrophy	4/263	14/7047	0.00141146	4	APICC_02050/APICC_02110/APICC_05835/APICC_06877
	GO:0014741	biological process	negative regulation of muscle hypertrophy	4/263	14/7047	0.00141146	4	APICC_02050/APICC_02110/APICC_05835/APICC_06877
	GO:0055022	biological process	negative regulation of cardiac muscle tissue growth	4/263	14/7047	0.00141146	4	APICC_00669/APICC_02110/APICC_05835/APICC_06877
	GO:0061117	biological process	negative regulation of heart growth	4/263	14/7047	0.00141146	4	APICC_00669/APICC_02110/APICC_05835/APICC_06877
	GO:0055024	biological process	regulation of cardiac muscle tissue development	7/263	46/7047	0.00143054	7	APICC_00669/APICC_02110/APICC_02172/APICC_03414/APICC_05835/APICC_06877/APICC_07476
	GO:0007127	biological process	meiosis I	10/263	88/7047	0.00152923	10	APICC_00375/APICC_00534/APICC_01418/APICC_02198/APICC_02423/APICC_03515/APICC_04022/APICC_08516/APICC_08974/APICC_09650
	GO:0071276	biological process	cellular response to cadmium ion	4/263	15/7047	0.00186876	4	APICC_00669/APICC_02754/APICC_02979/APICC_09465
	GO:0006732	biological process	obsolete coenzyme metabolic process	18/263	226/7047	0.00188523	18	APICC_02858/APICC_03560/APICC_03604/APICC_03605/APICC_03607/APICC_03608/APICC_03986/APICC_03994/APICC_05802/APICC_05835/APICC_05896/APICC_06705/APICC_07023/APICC_07966/APICC_08049/APICC_08688/APICC_08898/APICC_09264
	GO:0010677	biological process	negative regulation of cellular carbohydrate metabolic process	5/263	25/7047	0.00200403	5	APICC_03079/APICC_08142/APICC_08663/APICC_08898/APICC_09264
	GO:0000096	biological process	sulfur amino acid metabolic process	5/263	26/7047	0.0024067	5	APICC_02051/APICC_03994/APICC_05501/APICC_06427/APICC_09646
	GO:0006739	biological process	NADP metabolic process	5/263	26/7047	0.0024067	5	APICC_03607/APICC_03608/APICC_05835/APICC_08049/APICC_08688
	GO:1903580	biological process	positive regulation of ATP metabolic process	5/263	26/7047	0.0024067	5	APICC_02172/APICC_03560/APICC_03953/APICC_08898/APICC_09264
	GO:0019359	biological process	nicotinamide nucleotide biosynthetic process	6/263	38/7047	0.00257694	6	APICC_05835/APICC_07023/APICC_07966/APICC_08688/APICC_08898/APICC_09264
	GO:0019363	biological process	pyridine nucleotide biosynthetic process	6/263	38/7047	0.00257694	6	APICC_05835/APICC_07023/APICC_07966/APICC_08688/APICC_08898/APICC_09264
	GO:0033013	biological process	tetrapyrrole metabolic process	6/263	38/7047	0.00257694	6	APICC_02894/APICC_02979/APICC_03079/APICC_03986/APICC_08142/APICC_09661
	GO:0000280	biological process	nuclear division	22/263	312/7047	0.00292085	22	APICC_00281/APICC_00375/APICC_00436/APICC_00534/APICC_01418/APICC_02050/APICC_02172/APICC_02198/APICC_02249/APICC_02423/APICC_02897/APICC_03515/APICC_03715/APICC_04022/APICC_06877/APICC_08516/APICC_08770/APICC_08974/APICC_09042/APICC_09445/APICC_09465/APICC_09650
	GO:0042335	biological process	cuticle development	13/263	146/7047	0.00305621	13	APICC_02050/APICC_02249/APICC_03267/APICC_03414/APICC_03595/APICC_04253/APICC_04640/APICC_05503/APICC_05836/APICC_08145/APICC_08709/APICC_09066/APICC_09556
	GO:0055023	biological process	positive regulation of cardiac muscle tissue growth	4/263	17/7047	0.00307201	4	APICC_00669/APICC_02172/APICC_03414/APICC_07476
	GO:0035159	biological process	regulation of tube length, open tracheal system	6/263	40/7047	0.00336662	6	APICC_04253/APICC_04590/APICC_06584/APICC_06867/APICC_08709/APICC_09904
	GO:0010039	biological process	response to iron ion	5/263	28/7047	0.00338344	5	APICC_02172/APICC_02894/APICC_02979/APICC_05835/APICC_09661
	GO:0045912	biological process	negative regulation of carbohydrate metabolic process	5/263	28/7047	0.00338344	5	APICC_03079/APICC_08142/APICC_08663/APICC_08898/APICC_09264
	GO:0016051	biological process	carbohydrate biosynthetic process	9/263	83/7047	0.00359397	9	APICC_03604/APICC_03605/APICC_04253/APICC_05835/APICC_05896/APICC_07023/APICC_08709/APICC_08898/APICC_09264
	GO:0034620	biological process	cellular response to unfolded protein	9/263	84/7047	0.00389732	9	APICC_01876/APICC_02050/APICC_03560/APICC_03941/APICC_03942/APICC_05501/APICC_06096/APICC_07966/APICC_09465
	GO:0016616	molecular function	oxidoreductase activity, acting on the CH-OH group of donors, NAD or NADP as acceptor	8/227	70/6151	0.00398888	8	APICC_01857/APICC_03559/APICC_03604/APICC_03605/APICC_03909/APICC_05835/APICC_05896/APICC_08049
	GO:0046365	biological process	monosaccharide catabolic process	6/263	42/7047	0.00432371	6	APICC_03559/APICC_03604/APICC_03605/APICC_05896/APICC_08898/APICC_09264
	GO:0008198	molecular function	ferrous iron binding	4/227	19/6151	0.00452162	4	APICC_02894/APICC_09646/APICC_09661/APICC_09801
	GO:0042168	biological process	heme metabolic process	5/263	30/7047	0.0046168	5	APICC_02894/APICC_02979/APICC_03079/APICC_08142/APICC_09661
	GO:0045981	biological process	positive regulation of nucleotide metabolic process	5/263	30/7047	0.0046168	5	APICC_02172/APICC_03560/APICC_03953/APICC_08898/APICC_09264
	GO:1900544	biological process	positive regulation of purine nucleotide metabolic process	5/263	30/7047	0.0046168	5	APICC_02172/APICC_03560/APICC_03953/APICC_08898/APICC_09264
	GO:0071243	biological process	cellular response to arsenic-containing substance	4/263	19/7047	0.00471758	4	APICC_00669/APICC_02754/APICC_02979/APICC_09465
	GO:1900744	biological process	regulation of p38MAPK cascade	4/263	19/7047	0.00471758	4	APICC_02754/APICC_03609/APICC_07647/APICC_08136
	GO:2001171	biological process	positive regulation of ATP biosynthetic process	4/263	19/7047	0.00471758	4	APICC_03560/APICC_03953/APICC_08898/APICC_09264
	GO:0072525	biological process	pyridine-containing compound biosynthetic process	6/263	43/7047	0.00487122	6	APICC_05835/APICC_07023/APICC_07966/APICC_08688/APICC_08898/APICC_09264
	GO:0034101	biological process	erythrocyte homeostasis	7/263	57/7047	0.00498856	7	APICC_01417/APICC_02894/APICC_02979/APICC_04746/APICC_05835/APICC_06134/APICC_09661
	GO:0006098	biological process	pentose-phosphate shunt	3/263	10/7047	0.00507428	3	APICC_03607/APICC_03608/APICC_05835
	GO:0007060	biological process	male meiosis chromosome segregation	3/263	10/7047	0.00507428	3	APICC_02423/APICC_08516/APICC_09042
	GO:0007077	biological process	mitotic nuclear membrane disassembly	3/263	10/7047	0.00507428	3	APICC_00375/APICC_00436/APICC_02172
	GO:0042538	biological process	hyperosmotic salinity response	3/263	10/7047	0.00507428	3	APICC_02754/APICC_03267/APICC_08548
	GO:0048100	biological process	wing disc anterior/posterior pattern formation	3/263	10/7047	0.00507428	3	APICC_03414/APICC_07399/APICC_07406
	GO:0030261	biological process	chromosome condensation	7/263	58/7047	0.00549712	7	APICC_00375/APICC_02172/APICC_02897/APICC_03515/APICC_04022/APICC_05648/APICC_09445
	GO:0060421	biological process	positive regulation of heart growth	4/263	20/7047	0.00572663	4	APICC_00669/APICC_02172/APICC_03414/APICC_07476
	GO:0006949	biological process	syncytium formation	7/263	59/7047	0.00604358	7	APICC_01092/APICC_01435/APICC_02249/APICC_04023/APICC_07023/APICC_08518/APICC_09445
	GO:0016758	molecular function	hexosyltransferase activity	9/227	91/6151	0.00611026	9	APICC_03079/APICC_03080/APICC_03090/APICC_04253/APICC_06992/APICC_08142/APICC_08689/APICC_08709/APICC_09801
	GO:0000726	biological process	obsolete non-recombinational repair	6/263	45/7047	0.00611666	6	APICC_01418/APICC_02423/APICC_04022/APICC_04744/APICC_07054/APICC_08548
	GO:0048073	biological process	regulation of eye pigmentation	3/263	11/7047	0.00678646	3	APICC_03953/APICC_06867/APICC_09904
	GO:0061050	biological process	regulation of cell growth involved in cardiac muscle cell development	3/263	11/7047	0.00678646	3	APICC_05835/APICC_06877/APICC_07476
	GO:0006778	biological process	porphyrin-containing compound metabolic process	5/263	33/7047	0.00702085	5	APICC_02894/APICC_02979/APICC_03079/APICC_08142/APICC_09661
	GO:0046685	biological process	response to arsenic-containing substance	5/263	33/7047	0.00702085	5	APICC_00669/APICC_02754/APICC_02979/APICC_03941/APICC_09465
	GO:0048070	biological process	regulation of developmental pigmentation	5/263	33/7047	0.00702085	5	APICC_00669/APICC_03953/APICC_04640/APICC_06867/APICC_09904
	GO:0002262	biological process	myeloid cell homeostasis	7/263	61/7047	0.00725693	7	APICC_01417/APICC_02894/APICC_02979/APICC_04746/APICC_05835/APICC_06134/APICC_09661
	GO:0000138	cellular component	Golgi trans cisterna	4/261	21/6838	0.00742964	4	APICC_00217/APICC_02311/APICC_07053/APICC_09338
	GO:0016757	molecular function	glycosyltransferase activity	10/227	111/6151	0.00758583	10	APICC_03079/APICC_03080/APICC_03090/APICC_04253/APICC_06992/APICC_07966/APICC_08142/APICC_08689/APICC_08709/APICC_09801
	GO:0010611	biological process	regulation of cardiac muscle hypertrophy	5/263	34/7047	0.00798613	5	APICC_02050/APICC_02110/APICC_05835/APICC_06877/APICC_07476
	GO:0060043	biological process	regulation of cardiac muscle cell proliferation	4/263	22/7047	0.00815476	4	APICC_00669/APICC_02110/APICC_02172/APICC_03414
	GO:0016614	molecular function	oxidoreductase activity, acting on CH-OH group of donors	8/227	79/6151	0.00830676	8	APICC_01857/APICC_03559/APICC_03604/APICC_03605/APICC_03909/APICC_05835/APICC_05896/APICC_08049
	GO:0098813	biological process	nuclear chromosome segregation	14/263	183/7047	0.00831907	14	APICC_00375/APICC_00436/APICC_01418/APICC_02172/APICC_02198/APICC_02423/APICC_02897/APICC_03715/APICC_04022/APICC_08516/APICC_08770/APICC_09042/APICC_09445/APICC_09650
	GO:0003735	molecular function	structural constituent of ribosome	12/227	149/6151	0.00870589	12	APICC_00367/APICC_01417/APICC_01433/APICC_02405/APICC_03594/APICC_03596/APICC_03661/APICC_03992/APICC_04967/APICC_05883/APICC_05898/APICC_09107
	GO:0000097	biological process	sulfur amino acid biosynthetic process	3/263	12/7047	0.00880179	3	APICC_05501/APICC_06427/APICC_09646
	GO:0000098	biological process	sulfur amino acid catabolic process	3/263	12/7047	0.00880179	3	APICC_02051/APICC_05501/APICC_09646
	GO:0007110	biological process	meiosis I cytokinesis	3/263	12/7047	0.00880179	3	APICC_02050/APICC_08516/APICC_09505
	GO:0031281	biological process	positive regulation of cyclase activity	3/263	12/7047	0.00880179	3	APICC_00669/APICC_06502/APICC_06505
	GO:0035158	biological process	regulation of tube diameter, open tracheal system	3/263	12/7047	0.00880179	3	APICC_04253/APICC_06584/APICC_08709
	GO:0042219	biological process	cellular modified amino acid catabolic process	3/263	12/7047	0.00880179	3	APICC_02051/APICC_02858/APICC_03180
	GO:0060045	biological process	positive regulation of cardiac muscle cell proliferation	3/263	12/7047	0.00880179	3	APICC_00669/APICC_02172/APICC_03414
	GO:1900745	biological process	positive regulation of p38MAPK cascade	3/263	12/7047	0.00880179	3	APICC_02754/APICC_03609/APICC_07647
	GO:0030810	biological process	positive regulation of nucleotide biosynthetic process	4/263	23/7047	0.00958753	4	APICC_03560/APICC_03953/APICC_08898/APICC_09264
	GO:0055026	biological process	negative regulation of cardiac muscle tissue development	4/263	23/7047	0.00958753	4	APICC_00669/APICC_02110/APICC_05835/APICC_06877
	GO:0098586	biological process	cellular response to virus	4/263	23/7047	0.00958753	4	APICC_00669/APICC_03414/APICC_03560/APICC_06584
	GO:1900373	biological process	positive regulation of purine nucleotide biosynthetic process	4/263	23/7047	0.00958753	4	APICC_03560/APICC_03953/APICC_08898/APICC_09264
	GO:0048018	molecular function	receptor ligand activity	6/227	51/6151	0.0106221	6	APICC_00265/APICC_04824/APICC_05778/APICC_06868/APICC_08975/APICC_10088
	GO:0055076	biological process	transition metal ion homeostasis	7/263	66/7047	0.0110709	7	APICC_02894/APICC_02979/APICC_03558/APICC_04023/APICC_04606/APICC_07411/APICC_09661
	GO:0003148	biological process	outflow tract septum morphogenesis	3/263	13/7047	0.0111308	3	APICC_04781/APICC_06867/APICC_09904
	GO:0007279	biological process	pole cell formation	3/263	13/7047	0.0111308	3	APICC_02249/APICC_03560/APICC_09505
	GO:0019682	biological process	glyceraldehyde-3-phosphate metabolic process	3/263	13/7047	0.0111308	3	APICC_03607/APICC_03608/APICC_05835
	GO:0033127	biological process	regulation of histone phosphorylation	3/263	13/7047	0.0111308	3	APICC_02172/APICC_02198/APICC_07646
	GO:0042364	biological process	water-soluble vitamin biosynthetic process	3/263	13/7047	0.0111308	3	APICC_03604/APICC_03605/APICC_05896
	GO:0051156	biological process	glucose 6-phosphate metabolic process	3/263	13/7047	0.0111308	3	APICC_03607/APICC_03608/APICC_05835
	GO:0006030	biological process	chitin metabolic process	4/263	24/7047	0.0111745	4	APICC_03595/APICC_04253/APICC_07881/APICC_08709
	GO:0055025	biological process	positive regulation of cardiac muscle tissue development	4/263	24/7047	0.0111745	4	APICC_00669/APICC_02172/APICC_03414/APICC_07476
	GO:0014743	biological process	regulation of muscle hypertrophy	5/263	37/7047	0.0114275	5	APICC_02050/APICC_02110/APICC_05835/APICC_06877/APICC_07476
	GO:1902533	biological process	positive regulation of intracellular signal transduction	27/263	458/7047	0.0116475	27	APICC_00436/APICC_00669/APICC_01858/APICC_02050/APICC_02170/APICC_02564/APICC_02754/APICC_03267/APICC_03414/APICC_03558/APICC_03597/APICC_03609/APICC_03953/APICC_03984/APICC_04019/APICC_04022/APICC_04023/APICC_04380/APICC_04824/APICC_05501/APICC_06502/APICC_06505/APICC_06867/APICC_07425/APICC_07647/APICC_09465/APICC_09904
	GO:0022411	biological process	cellular component disassembly	18/263	270/7047	0.0119495	18	APICC_00375/APICC_00436/APICC_01433/APICC_01577/APICC_02172/APICC_02198/APICC_02347/APICC_02405/APICC_02564/APICC_03560/APICC_03594/APICC_03953/APICC_03992/APICC_05898/APICC_06584/APICC_06867/APICC_08516/APICC_09904
	GO:0030968	biological process	endoplasmic reticulum unfolded protein response	7/263	67/7047	0.0119808	7	APICC_02050/APICC_03560/APICC_03941/APICC_03942/APICC_05501/APICC_06096/APICC_07966
	GO:0005975	biological process	carbohydrate metabolic process	17/263	250/7047	0.0119891	17	APICC_00669/APICC_03079/APICC_03559/APICC_03595/APICC_03604/APICC_03605/APICC_03607/APICC_03608/APICC_04253/APICC_04966/APICC_05835/APICC_05896/APICC_07023/APICC_08142/APICC_08709/APICC_08898/APICC_09264
	GO:0032204	biological process	regulation of telomere maintenance	6/263	52/7047	0.0123142	6	APICC_01418/APICC_02050/APICC_02754/APICC_04022/APICC_05885/APICC_08548
	GO:0006302	biological process	double-strand break repair	11/263	136/7047	0.0125008	11	APICC_00534/APICC_01418/APICC_02423/APICC_03560/APICC_04021/APICC_04022/APICC_04744/APICC_07054/APICC_07425/APICC_08548/APICC_09650
	GO:0045132	biological process	meiotic chromosome segregation	8/263	84/7047	0.0127185	8	APICC_00375/APICC_01418/APICC_02198/APICC_02423/APICC_04022/APICC_08516/APICC_09042/APICC_09650
	GO:0006986	biological process	response to unfolded protein	9/263	101/7047	0.0127939	9	APICC_01876/APICC_02050/APICC_03560/APICC_03941/APICC_03942/APICC_05501/APICC_06096/APICC_07966/APICC_09465
	GO:0031570	biological process	DNA integrity checkpoint signaling	9/263	101/7047	0.0127939	9	APICC_00669/APICC_01418/APICC_02111/APICC_02172/APICC_04022/APICC_04744/APICC_05648/APICC_08495/APICC_08770
	GO:0007129	biological process	homologous chromosome pairing at meiosis	4/263	25/7047	0.0129212	4	APICC_00375/APICC_01418/APICC_02198/APICC_02423
	GO:0050892	biological process	intestinal absorption	4/263	25/7047	0.0129212	4	APICC_02780/APICC_02894/APICC_08136/APICC_09661
	GO:0000794	cellular component	condensed nuclear chromosome	7/261	67/6838	0.0134227	7	APICC_00534/APICC_01418/APICC_02172/APICC_02423/APICC_04022/APICC_08974/APICC_09445
	GO:0035151	biological process	regulation of tube size, open tracheal system	6/263	53/7047	0.0134649	6	APICC_04253/APICC_04590/APICC_06584/APICC_06867/APICC_08709/APICC_09904
	GO:2001252	biological process	positive regulation of chromosome organization	12/263	156/7047	0.0135117	12	APICC_00436/APICC_00534/APICC_01418/APICC_02110/APICC_02172/APICC_02754/APICC_03953/APICC_04022/APICC_07646/APICC_08136/APICC_08548/APICC_08770
	GO:0035967	biological process	cellular response to topologically incorrect protein	9/263	102/7047	0.0135894	9	APICC_01876/APICC_02050/APICC_03560/APICC_03941/APICC_03942/APICC_05501/APICC_06096/APICC_07966/APICC_09465
	GO:0051146	biological process	striated muscle cell differentiation	15/263	214/7047	0.0137735	15	APICC_00375/APICC_00669/APICC_01092/APICC_01435/APICC_02050/APICC_02172/APICC_04023/APICC_04426/APICC_04589/APICC_04781/APICC_05248/APICC_07023/APICC_08518/APICC_09445/APICC_09481
	GO:0001714	biological process	endodermal cell fate specification	3/263	14/7047	0.0137815	3	APICC_05836/APICC_06867/APICC_09904
	GO:0009067	biological process	aspartate family amino acid biosynthetic process	3/263	14/7047	0.0137815	3	APICC_05501/APICC_06427/APICC_09801
	GO:0030588	biological process	pseudocleavage	3/263	14/7047	0.0137815	3	APICC_01435/APICC_02249/APICC_09505
	GO:0046461	biological process	neutral lipid catabolic process	3/263	14/7047	0.0137815	3	APICC_00721/APICC_03180/APICC_06771
	GO:0046464	biological process	acylglycerol catabolic process	3/263	14/7047	0.0137815	3	APICC_00721/APICC_03180/APICC_06771
	GO:0051081	biological process	nuclear membrane disassembly	3/263	14/7047	0.0137815	3	APICC_00375/APICC_00436/APICC_02172
	GO:0060914	biological process	heart formation	3/263	14/7047	0.0137815	3	APICC_03414/APICC_06867/APICC_09904
	GO:0071392	biological process	cellular response to estradiol stimulus	3/263	14/7047	0.0137815	3	APICC_03079/APICC_08142/APICC_09465
	GO:0006140	biological process	regulation of nucleotide metabolic process	7/263	69/7047	0.0139608	7	APICC_02172/APICC_03560/APICC_03953/APICC_05577/APICC_07023/APICC_08898/APICC_09264
	GO:0016052	biological process	carbohydrate catabolic process	7/263	69/7047	0.0139608	7	APICC_03559/APICC_03604/APICC_03605/APICC_05896/APICC_07023/APICC_08898/APICC_09264
	GO:0006303	biological process	double-strand break repair via nonhomologous end joining	5/263	39/7047	0.0142121	5	APICC_01418/APICC_02423/APICC_04744/APICC_07054/APICC_08548
	GO:0009651	biological process	response to salt stress	4/263	26/7047	0.0148329	4	APICC_00669/APICC_02754/APICC_03267/APICC_08548
	GO:0000075	biological process	cell cycle checkpoint signaling	11/263	140/7047	0.0152839	11	APICC_00669/APICC_01418/APICC_02111/APICC_02172/APICC_04022/APICC_04744/APICC_05648/APICC_07006/APICC_08495/APICC_08770/APICC_09042
	GO:0051303	biological process	establishment of chromosome localization	6/263	55/7047	0.015988	6	APICC_02172/APICC_02198/APICC_02423/APICC_08516/APICC_08770/APICC_09042
	GO:0007059	biological process	chromosome segregation	15/263	218/7047	0.0160818	15	APICC_00375/APICC_00436/APICC_01418/APICC_02172/APICC_02198/APICC_02423/APICC_02897/APICC_03715/APICC_04022/APICC_07054/APICC_08516/APICC_08770/APICC_09042/APICC_09445/APICC_09650
	GO:0044282	biological process	small molecule catabolic process	15/263	219/7047	0.016703	15	APICC_00436/APICC_01416/APICC_02051/APICC_02858/APICC_03559/APICC_03604/APICC_03605/APICC_03909/APICC_05501/APICC_05896/APICC_06705/APICC_06868/APICC_08898/APICC_09264/APICC_09646
	GO:0007202	biological process	activation of phospholipase C activity	3/263	15/7047	0.0167597	3	APICC_03091/APICC_06502/APICC_06505
	GO:0031468	biological process	nuclear membrane reassembly	3/263	15/7047	0.0167597	3	APICC_00375/APICC_00436/APICC_02050
	GO:0071474	biological process	cellular hyperosmotic response	3/263	15/7047	0.0167597	3	APICC_02754/APICC_03267/APICC_08548
	GO:0090279	biological process	regulation of calcium ion import	3/263	15/7047	0.0167597	3	APICC_03558/APICC_06502/APICC_06505
	GO:0031985	cellular component	Golgi cisterna	7/261	70/6838	0.0168086	7	APICC_00217/APICC_00988/APICC_02053/APICC_02311/APICC_06584/APICC_07053/APICC_09338
	GO:0000819	biological process	sister chromatid segregation	10/263	124/7047	0.0171834	10	APICC_00375/APICC_00436/APICC_01418/APICC_02172/APICC_02897/APICC_03715/APICC_08516/APICC_08770/APICC_09042/APICC_09445
	GO:0006767	biological process	water-soluble vitamin metabolic process	6/263	56/7047	0.0173646	6	APICC_00673/APICC_02858/APICC_03604/APICC_03605/APICC_03986/APICC_05896
	GO:0007520	biological process	myoblast fusion	6/263	56/7047	0.0173646	6	APICC_01092/APICC_01435/APICC_04023/APICC_07023/APICC_08518/APICC_09445
	GO:0007569	biological process	cell aging	5/263	41/7047	0.0174196	5	APICC_00534/APICC_00669/APICC_02050/APICC_04022/APICC_08324
	GO:0051310	biological process	metaphase plate congression	5/263	41/7047	0.0174196	5	APICC_02172/APICC_02423/APICC_08516/APICC_08770/APICC_09042
	GO:0005795	cellular component	Golgi stack	9/261	104/6838	0.0174422	9	APICC_00217/APICC_00375/APICC_00988/APICC_02053/APICC_02311/APICC_06584/APICC_07053/APICC_09042/APICC_09338
	GO:0016054	biological process	organic acid catabolic process	11/263	143/7047	0.0176597	11	APICC_00436/APICC_01416/APICC_02051/APICC_02858/APICC_03604/APICC_03605/APICC_03909/APICC_05501/APICC_05896/APICC_06705/APICC_09646
	GO:0046395	biological process	carboxylic acid catabolic process	11/263	143/7047	0.0176597	11	APICC_00436/APICC_01416/APICC_02051/APICC_02858/APICC_03604/APICC_03605/APICC_03909/APICC_05501/APICC_05896/APICC_06705/APICC_09646
	GO:0000137	cellular component	Golgi cis cisterna	3/261	15/6838	0.0177919	3	APICC_00988/APICC_02311/APICC_06584
	GO:0097386	cellular component	glial cell projection	3/261	15/6838	0.0177919	3	APICC_00266/APICC_03953/APICC_08136
	GO:0030099	biological process	myeloid cell differentiation	10/263	125/7047	0.0180852	10	APICC_00669/APICC_01417/APICC_02894/APICC_03515/APICC_04746/APICC_05835/APICC_06134/APICC_06502/APICC_06505/APICC_09661
	GO:0006006	biological process	glucose metabolic process	7/263	73/7047	0.0186049	7	APICC_00669/APICC_03604/APICC_03605/APICC_05896/APICC_07023/APICC_08898/APICC_09264
	GO:0019439	biological process	aromatic compound catabolic process	19/263	304/7047	0.0186714	19	APICC_00367/APICC_00673/APICC_01417/APICC_02111/APICC_02423/APICC_02858/APICC_02979/APICC_03079/APICC_03560/APICC_03661/APICC_05883/APICC_05885/APICC_06705/APICC_06868/APICC_07023/APICC_08142/APICC_08898/APICC_09107/APICC_09264
	GO:0000768	biological process	syncytium formation by plasma membrane fusion	6/263	57/7047	0.0188206	6	APICC_01092/APICC_01435/APICC_04023/APICC_07023/APICC_08518/APICC_09445
	GO:0050000	biological process	chromosome localization	6/263	57/7047	0.0188206	6	APICC_02172/APICC_02198/APICC_02423/APICC_08516/APICC_08770/APICC_09042
	GO:0033762	biological process	response to glucagon	4/263	28/7047	0.0191694	4	APICC_06705/APICC_08898/APICC_09264/APICC_09646
	GO:0008010	molecular function	structural constituent of chitin-based larval cuticle	3/227	16/6151	0.0194607	3	APICC_08145/APICC_09066/APICC_09556
	GO:0015020	molecular function	glucuronosyltransferase activity	3/227	16/6151	0.0194607	3	APICC_03079/APICC_03080/APICC_08142
	GO:0071248	biological process	cellular response to metal ion	8/263	91/7047	0.0198633	8	APICC_00669/APICC_02172/APICC_02754/APICC_02894/APICC_02979/APICC_03558/APICC_09465/APICC_09661
	GO:1903046	biological process	meiotic cell cycle process	16/263	244/7047	0.019908	16	APICC_00375/APICC_00534/APICC_01418/APICC_02050/APICC_02198/APICC_02249/APICC_02423/APICC_03515/APICC_04022/APICC_08516/APICC_08663/APICC_08974/APICC_09042/APICC_09465/APICC_09505/APICC_09650
	GO:0000266	biological process	mitochondrial fission	3/263	16/7047	0.020069	3	APICC_00436/APICC_02564/APICC_03953
	GO:0010863	biological process	positive regulation of phospholipase C activity	3/263	16/7047	0.020069	3	APICC_03091/APICC_06502/APICC_06505
	GO:0019852	biological process	L-ascorbic acid metabolic process	3/263	16/7047	0.020069	3	APICC_03604/APICC_03605/APICC_05896
	GO:1903204	biological process	negative regulation of oxidative stress-induced neuron death	3/263	16/7047	0.020069	3	APICC_01303/APICC_01304/APICC_03953
	GO:0000070	biological process	mitotic sister chromatid segregation	9/263	109/7047	0.020221	9	APICC_00375/APICC_00436/APICC_02172/APICC_02897/APICC_03715/APICC_08516/APICC_08770/APICC_09042/APICC_09445
	GO:0140013	biological process	meiotic nuclear division	14/263	205/7047	0.0208738	14	APICC_00375/APICC_00534/APICC_01418/APICC_02050/APICC_02198/APICC_02249/APICC_02423/APICC_03515/APICC_04022/APICC_08516/APICC_08974/APICC_09042/APICC_09465/APICC_09650
	GO:0055072	biological process	iron ion homeostasis	5/263	43/7047	0.0210732	5	APICC_02894/APICC_02979/APICC_04023/APICC_07411/APICC_09661
	GO:0043516	biological process	regulation of DNA damage response, signal transduction by p53 class mediator	4/263	29/7047	0.021602	4	APICC_02195/APICC_02198/APICC_04022/APICC_05648
	GO:0044391	cellular component	ribosomal subunit	12/261	163/6838	0.0216759	12	APICC_00367/APICC_01417/APICC_01433/APICC_02405/APICC_03594/APICC_03596/APICC_03661/APICC_03992/APICC_04967/APICC_05883/APICC_05898/APICC_09107
	GO:0140014	biological process	mitotic nuclear division	11/263	148/7047	0.0222173	11	APICC_00281/APICC_00375/APICC_00436/APICC_02172/APICC_02897/APICC_03715/APICC_06877/APICC_08516/APICC_08770/APICC_09042/APICC_09445
	GO:0030545	molecular function	signaling receptor regulator activity	6/227	60/6151	0.0224761	6	APICC_00265/APICC_04824/APICC_05778/APICC_06868/APICC_08975/APICC_10088
	GO:1901361	biological process	organic cyclic compound catabolic process	19/263	311/7047	0.0230885	19	APICC_00367/APICC_00673/APICC_01417/APICC_02111/APICC_02423/APICC_02858/APICC_02979/APICC_03079/APICC_03560/APICC_03661/APICC_05883/APICC_05885/APICC_06705/APICC_06868/APICC_07023/APICC_08142/APICC_08898/APICC_09107/APICC_09264
	GO:0002251	biological process	organ or tissue specific immune response	3/263	17/7047	0.0237113	3	APICC_00669/APICC_02754/APICC_03414
	GO:0002385	biological process	mucosal immune response	3/263	17/7047	0.0237113	3	APICC_00669/APICC_02754/APICC_03414
	GO:0009110	biological process	vitamin biosynthetic process	3/263	17/7047	0.0237113	3	APICC_03604/APICC_03605/APICC_05896
	GO:0030397	biological process	membrane disassembly	3/263	17/7047	0.0237113	3	APICC_00375/APICC_00436/APICC_02172
	GO:0034629	biological process	protein-containing complex localization	3/263	17/7047	0.0237113	3	APICC_02050/APICC_07425/APICC_08136
	GO:0046688	biological process	response to copper ion	4/263	30/7047	0.0242151	4	APICC_02894/APICC_04606/APICC_09465/APICC_09661
	GO:0018105	biological process	peptidyl-serine phosphorylation	9/263	113/7047	0.0249232	9	APICC_00375/APICC_00669/APICC_02172/APICC_03267/APICC_03515/APICC_03953/APICC_03984/APICC_04022/APICC_08663
	GO:0000077	biological process	DNA damage checkpoint signaling	8/263	95/7047	0.0250383	8	APICC_00669/APICC_01418/APICC_02111/APICC_02172/APICC_04022/APICC_04744/APICC_05648/APICC_08495
	GO:0051783	biological process	regulation of nuclear division	13/263	190/7047	0.0251424	13	APICC_00436/APICC_00534/APICC_01878/APICC_02172/APICC_02198/APICC_02249/APICC_03515/APICC_04022/APICC_07006/APICC_07425/APICC_08136/APICC_08770/APICC_09042
	GO:0030808	biological process	regulation of nucleotide biosynthetic process	5/263	45/7047	0.0251936	5	APICC_03560/APICC_03953/APICC_05577/APICC_08898/APICC_09264
	GO:0043502	biological process	regulation of muscle adaptation	5/263	45/7047	0.0251936	5	APICC_02050/APICC_02110/APICC_05835/APICC_06877/APICC_07476
	GO:1900371	biological process	regulation of purine nucleotide biosynthetic process	5/263	45/7047	0.0251936	5	APICC_03560/APICC_03953/APICC_05577/APICC_08898/APICC_09264
	GO:0033674	biological process	positive regulation of kinase activity	17/263	272/7047	0.0253527	17	APICC_00281/APICC_00669/APICC_01418/APICC_01858/APICC_02172/APICC_02754/APICC_03267/APICC_03953/APICC_03984/APICC_04019/APICC_06867/APICC_07647/APICC_07966/APICC_08548/APICC_08898/APICC_09264/APICC_09904
	GO:0006766	biological process	vitamin metabolic process	6/263	61/7047	0.0254759	6	APICC_00673/APICC_02858/APICC_03604/APICC_03605/APICC_03986/APICC_05896
	GO:0031100	biological process	animal organ regeneration	6/263	61/7047	0.0254759	6	APICC_02979/APICC_03079/APICC_03414/APICC_08142/APICC_08898/APICC_09264
	GO:0044270	biological process	cellular nitrogen compound catabolic process	18/263	294/7047	0.0261207	18	APICC_00367/APICC_00673/APICC_01417/APICC_02111/APICC_02423/APICC_02858/APICC_02979/APICC_03079/APICC_03560/APICC_03661/APICC_05883/APICC_05885/APICC_06868/APICC_07023/APICC_08142/APICC_08898/APICC_09107/APICC_09264
	GO:0005506	molecular function	iron ion binding	5/227	46/6151	0.026229	5	APICC_02894/APICC_02981/APICC_09646/APICC_09661/APICC_09801
	GO:0046700	biological process	heterocycle catabolic process	18/263	295/7047	0.0269089	18	APICC_00367/APICC_00673/APICC_01417/APICC_02111/APICC_02423/APICC_02858/APICC_02979/APICC_03079/APICC_03560/APICC_03661/APICC_05883/APICC_05885/APICC_06868/APICC_07023/APICC_08142/APICC_08898/APICC_09107/APICC_09264
	GO:0006879	biological process	cellular iron ion homeostasis	4/263	31/7047	0.0270114	4	APICC_02894/APICC_02979/APICC_07411/APICC_09661
	GO:0031440	biological process	regulation of mRNA 3-end processing	4/263	31/7047	0.0270114	4	APICC_02172/APICC_02194/APICC_05252/APICC_09465
	GO:0032206	biological process	positive regulation of telomere maintenance	4/263	31/7047	0.0270114	4	APICC_01418/APICC_02754/APICC_04022/APICC_08548
	GO:0032210	biological process	regulation of telomere maintenance via telomerase	4/263	31/7047	0.0270114	4	APICC_02754/APICC_04022/APICC_05885/APICC_08548
	GO:0035987	biological process	endodermal cell differentiation	4/263	31/7047	0.0270114	4	APICC_04589/APICC_05836/APICC_06867/APICC_09904
	GO:0061162	biological process	establishment of monopolar cell polarity	4/263	31/7047	0.0270114	4	APICC_06584/APICC_06867/APICC_08136/APICC_09904
	GO:0061339	biological process	establishment or maintenance of monopolar cell polarity	4/263	31/7047	0.0270114	4	APICC_06584/APICC_06867/APICC_08136/APICC_09904
	GO:1900542	biological process	regulation of purine nucleotide metabolic process	6/263	62/7047	0.0273562	6	APICC_02172/APICC_03560/APICC_03953/APICC_05577/APICC_08898/APICC_09264
	GO:0051233	cellular component	spindle midzone	5/261	45/6838	0.0274195	5	APICC_02172/APICC_06877/APICC_08136/APICC_08516/APICC_09042
	GO:0010469	biological process	regulation of signaling receptor activity	9/263	115/7047	0.027545	9	APICC_00265/APICC_03953/APICC_04824/APICC_05778/APICC_06502/APICC_06505/APICC_06868/APICC_08975/APICC_10088
	GO:2001251	biological process	negative regulation of chromosome organization	9/263	115/7047	0.027545	9	APICC_02110/APICC_02198/APICC_02754/APICC_05648/APICC_05885/APICC_07006/APICC_07646/APICC_08548/APICC_09042
	GO:0007448	biological process	anterior/posterior pattern specification, imaginal disc	3/263	18/7047	0.0276865	3	APICC_03414/APICC_07399/APICC_07406
	GO:0007566	biological process	embryo implantation	3/263	18/7047	0.0276865	3	APICC_04022/APICC_04589/APICC_05883
	GO:0032212	biological process	positive regulation of telomere maintenance via telomerase	3/263	18/7047	0.0276865	3	APICC_02754/APICC_04022/APICC_08548
	GO:0090103	biological process	cochlea morphogenesis	3/263	18/7047	0.0276865	3	APICC_03414/APICC_06867/APICC_09904
	GO:1904263	biological process	positive regulation of TORC1 signaling	3/263	18/7047	0.0276865	3	APICC_03414/APICC_04380/APICC_07425
	GO:0031463	cellular component	Cul3-RING ubiquitin ligase complex	3/261	18/6838	0.0293377	3	APICC_00703/APICC_05804/APICC_08644
	GO:0051053	biological process	negative regulation of DNA metabolic process	8/263	98/7047	0.0294919	8	APICC_01418/APICC_02423/APICC_04022/APICC_05885/APICC_08495/APICC_08548/APICC_09465/APICC_09650
	GO:0051384	biological process	response to glucocorticoid	8/263	98/7047	0.0294919	8	APICC_02050/APICC_03079/APICC_06502/APICC_06505/APICC_08142/APICC_08898/APICC_09264/APICC_09646
	GO:0051193	biological process	obsolete regulation of cofactor metabolic process	5/263	47/7047	0.029798	5	APICC_03953/APICC_05577/APICC_07023/APICC_08898/APICC_09264
	GO:0045843	biological process	negative regulation of striated muscle tissue development	4/263	32/7047	0.029993	4	APICC_00669/APICC_02110/APICC_05835/APICC_06877
	GO:0099172	biological process	presynapse organization	4/263	32/7047	0.029993	4	APICC_01435/APICC_06867/APICC_07006/APICC_09904
	GO:0048546	biological process	digestive tract morphogenesis	9/263	117/7047	0.0303557	9	APICC_02050/APICC_03414/APICC_04253/APICC_05836/APICC_06867/APICC_07399/APICC_07406/APICC_08709/APICC_09904
	GO:0005214	molecular function	structural constituent of chitin-based cuticle	3/227	19/6151	0.031055	3	APICC_08145/APICC_09066/APICC_09556
	GO:0008375	molecular function	acetylglucosaminyltransferase activity	3/227	19/6151	0.031055	3	APICC_03090/APICC_04253/APICC_08709
	GO:0042302	molecular function	structural constituent of cuticle	3/227	19/6151	0.031055	3	APICC_08145/APICC_09066/APICC_09556
	GO:0032984	biological process	protein-containing complex disassembly	12/263	176/7047	0.031491	12	APICC_00436/APICC_01433/APICC_01577/APICC_02347/APICC_02405/APICC_03560/APICC_03594/APICC_03992/APICC_05898/APICC_06867/APICC_08516/APICC_09904
	GO:0001711	biological process	endodermal cell fate commitment	3/263	19/7047	0.0319931	3	APICC_05836/APICC_06867/APICC_09904
	GO:0002082	biological process	regulation of oxidative phosphorylation	3/263	19/7047	0.0319931	3	APICC_02172/APICC_03560/APICC_03953
	GO:0006656	biological process	phosphatidylcholine biosynthetic process	3/263	19/7047	0.0319931	3	APICC_00436/APICC_02052/APICC_09932
	GO:0008608	biological process	attachment of spindle microtubules to kinetochore	3/263	19/7047	0.0319931	3	APICC_02172/APICC_08516/APICC_08770
	GO:0021799	biological process	cerebral cortex radially oriented cell migration	3/263	19/7047	0.0319931	3	APICC_00703/APICC_03414/APICC_04589
	GO:0070986	biological process	left/right axis specification	3/263	19/7047	0.0319931	3	APICC_05836/APICC_06867/APICC_09904
	GO:0090398	biological process	cellular senescence	3/263	19/7047	0.0319931	3	APICC_00534/APICC_00669/APICC_02050
	GO:1900274	biological process	regulation of phospholipase C activity	3/263	19/7047	0.0319931	3	APICC_03091/APICC_06502/APICC_06505
	GO:1904358	biological process	positive regulation of telomere maintenance via telomere lengthening	3/263	19/7047	0.0319931	3	APICC_02754/APICC_04022/APICC_08548
	GO:0031532	biological process	actin cytoskeleton reorganization	5/263	48/7047	0.0322863	5	APICC_00436/APICC_01435/APICC_04781/APICC_08136/APICC_09505
	GO:0046916	biological process	cellular transition metal ion homeostasis	5/263	48/7047	0.0322863	5	APICC_02894/APICC_02979/APICC_03558/APICC_07411/APICC_09661
	GO:0031334	biological process	positive regulation of protein-containing complex assembly	11/263	157/7047	0.0325095	11	APICC_01435/APICC_02050/APICC_02111/APICC_03560/APICC_03953/APICC_04022/APICC_07411/APICC_08136/APICC_08770/APICC_08975/APICC_09505
	GO:0007080	biological process	mitotic metaphase plate congression	4/263	33/7047	0.0331616	4	APICC_02172/APICC_08516/APICC_08770/APICC_09042
	GO:0033574	biological process	response to testosterone	4/263	33/7047	0.0331616	4	APICC_03079/APICC_08136/APICC_08142/APICC_09465
	GO:0048557	biological process	embryonic digestive tract morphogenesis	4/263	33/7047	0.0331616	4	APICC_03414/APICC_05836/APICC_06867/APICC_09904
	GO:0051054	biological process	positive regulation of DNA metabolic process	10/263	138/7047	0.0331926	10	APICC_01418/APICC_02198/APICC_02423/APICC_02754/APICC_03414/APICC_04022/APICC_04744/APICC_08548/APICC_08770/APICC_09465
	GO:0035966	biological process	response to topologically incorrect protein	9/263	119/7047	0.033361	9	APICC_01876/APICC_02050/APICC_03560/APICC_03941/APICC_03942/APICC_05501/APICC_06096/APICC_07966/APICC_09465
	GO:0051260	biological process	protein homooligomerization	11/263	158/7047	0.0338324	11	APICC_00266/APICC_01876/APICC_02564/APICC_02979/APICC_03560/APICC_04317/APICC_05501/APICC_06867/APICC_08688/APICC_09465/APICC_09904
	GO:0090407	biological process	organophosphate biosynthetic process	20/263	347/7047	0.0345111	20	APICC_00436/APICC_01578/APICC_02052/APICC_02981/APICC_03090/APICC_03604/APICC_03605/APICC_03606/APICC_03994/APICC_04022/APICC_05835/APICC_05896/APICC_07023/APICC_07476/APICC_07966/APICC_08688/APICC_08689/APICC_08898/APICC_09264/APICC_09932
	GO:0046686	biological process	response to cadmium ion	5/263	49/7047	0.0349008	5	APICC_00669/APICC_02754/APICC_02979/APICC_03558/APICC_09465
	GO:0005657	cellular component	replication fork	5/261	48/6838	0.0350702	5	APICC_00648/APICC_02198/APICC_04021/APICC_08495/APICC_08770
	GO:0048635	biological process	negative regulation of muscle organ development	4/263	34/7047	0.0365183	4	APICC_00669/APICC_02110/APICC_05835/APICC_06877
	GO:1901862	biological process	negative regulation of muscle tissue development	4/263	34/7047	0.0365183	4	APICC_00669/APICC_02110/APICC_05835/APICC_06877
	GO:0000729	biological process	DNA double-strand break processing	3/263	20/7047	0.0366284	3	APICC_00534/APICC_01418/APICC_04022
	GO:0071470	biological process	cellular response to osmotic stress	3/263	20/7047	0.0366284	3	APICC_02754/APICC_03267/APICC_08548
	GO:1902751	biological process	positive regulation of cell cycle G2/M phase transition	3/263	20/7047	0.0366284	3	APICC_02050/APICC_02172/APICC_09465
	GO:0015935	cellular component	small ribosomal subunit	6/261	65/6838	0.0368164	6	APICC_00367/APICC_01417/APICC_01433/APICC_02405/APICC_03596/APICC_03992
	GO:0062014	biological process	negative regulation of small molecule metabolic process	5/263	50/7047	0.0376427	5	APICC_03079/APICC_08142/APICC_08663/APICC_08898/APICC_09264
	GO:0048029	molecular function	monosaccharide binding	4/227	35/6151	0.0386295	4	APICC_03607/APICC_03608/APICC_05835/APICC_09801
	GO:0007565	biological process	female pregnancy	7/263	85/7047	0.0388092	7	APICC_00265/APICC_02198/APICC_04022/APICC_04589/APICC_05883/APICC_09465/APICC_10088
	GO:0016202	biological process	regulation of striated muscle tissue development	7/263	85/7047	0.0388092	7	APICC_00669/APICC_02110/APICC_02172/APICC_03414/APICC_05835/APICC_06877/APICC_07476
	GO:0051321	biological process	meiotic cell cycle	16/263	265/7047	0.0388159	16	APICC_00375/APICC_00534/APICC_01418/APICC_02050/APICC_02198/APICC_02249/APICC_02423/APICC_03515/APICC_04022/APICC_08516/APICC_08663/APICC_08974/APICC_09042/APICC_09465/APICC_09505/APICC_09650
	GO:0006972	biological process	hyperosmotic response	4/263	35/7047	0.0400639	4	APICC_00669/APICC_02754/APICC_03267/APICC_08548
	GO:0045143	biological process	homologous chromosome segregation	4/263	35/7047	0.0400639	4	APICC_00375/APICC_01418/APICC_02198/APICC_02423
	GO:0048027	molecular function	mRNA 5-UTR binding	3/227	21/6151	0.0403958	3	APICC_01417/APICC_02894/APICC_09661
	GO:0002573	biological process	myeloid leukocyte differentiation	5/263	51/7047	0.0405132	5	APICC_00669/APICC_02894/APICC_06502/APICC_06505/APICC_09661
	GO:0007029	biological process	endoplasmic reticulum organization	5/263	51/7047	0.0405132	5	APICC_00436/APICC_02348/APICC_03560/APICC_03941/APICC_06584
	GO:0017144	biological process	xenobiotic metabolic process	22/263	398/7047	0.0408514	22	APICC_00673/APICC_02858/APICC_02894/APICC_03079/APICC_03560/APICC_03595/APICC_03606/APICC_03986/APICC_04253/APICC_05501/APICC_06427/APICC_06705/APICC_06777/APICC_06868/APICC_07023/APICC_07881/APICC_08142/APICC_08709/APICC_08898/APICC_09264/APICC_09661/APICC_09932
	GO:0010675	biological process	regulation of cellular carbohydrate metabolic process	7/263	86/7047	0.0409606	7	APICC_03079/APICC_06777/APICC_07023/APICC_08142/APICC_08663/APICC_08898/APICC_09264
	GO:1901861	biological process	regulation of muscle tissue development	7/263	86/7047	0.0409606	7	APICC_00669/APICC_02110/APICC_02172/APICC_03414/APICC_05835/APICC_06877/APICC_07476
	GO:0000076	biological process	DNA replication checkpoint signaling	3/263	21/7047	0.0415881	3	APICC_04022/APICC_08495/APICC_08770
	GO:0007277	biological process	pole cell development	3/263	21/7047	0.0415881	3	APICC_02249/APICC_03560/APICC_09505
	GO:0062033	biological process	positive regulation of mitotic sister chromatid segregation	3/263	21/7047	0.0415881	3	APICC_00534/APICC_08136/APICC_08770
	GO:1902253	biological process	regulation of intrinsic apoptotic signaling pathway by p53 class mediator	3/263	21/7047	0.0415881	3	APICC_02198/APICC_02981/APICC_03597
	GO:1903203	biological process	regulation of oxidative stress-induced neuron death	3/263	21/7047	0.0415881	3	APICC_01303/APICC_01304/APICC_03953
	GO:0006261	biological process	DNA-dependent DNA replication	8/263	105/7047	0.0419385	8	APICC_00648/APICC_01411/APICC_02897/APICC_02981/APICC_04021/APICC_08495/APICC_08770/APICC_09650
	GO:0000151	cellular component	ubiquitin ligase complex	12/261	181/6838	0.043692	12	APICC_00703/APICC_01092/APICC_02198/APICC_03107/APICC_04379/APICC_04744/APICC_05248/APICC_05503/APICC_05804/APICC_07411/APICC_08644/APICC_08662
	GO:0031146	biological process	SCF-dependent proteasomal ubiquitin-dependent protein catabolic process	4/263	36/7047	0.0437986	4	APICC_00703/APICC_03107/APICC_04379/APICC_08662
	GO:0051984	biological process	positive regulation of chromosome segregation	4/263	36/7047	0.0437986	4	APICC_00534/APICC_02172/APICC_08136/APICC_08770
	GO:1904356	biological process	regulation of telomere maintenance via telomere lengthening	4/263	36/7047	0.0437986	4	APICC_02754/APICC_04022/APICC_05885/APICC_08548
	GO:2001169	biological process	regulation of ATP biosynthetic process	4/263	36/7047	0.0437986	4	APICC_03560/APICC_03953/APICC_08898/APICC_09264
	GO:0043624	biological process	protein-containing complex disassembly	8/263	106/7047	0.0439627	8	APICC_00436/APICC_01433/APICC_02347/APICC_02405/APICC_03594/APICC_03992/APICC_05898/APICC_08516
	GO:0035861	cellular component	site of double-strand break	3/261	21/6838	0.0439886	3	APICC_00534/APICC_01418/APICC_03560
	GO:0042692	biological process	muscle cell differentiation	15/263	248/7047	0.0440021	15	APICC_00375/APICC_00669/APICC_01092/APICC_01435/APICC_02050/APICC_02172/APICC_04023/APICC_04426/APICC_04589/APICC_04781/APICC_05248/APICC_07023/APICC_08518/APICC_09445/APICC_09481
	GO:0017048	molecular function	small GTPase binding	7/227	89/6151	0.0453755	7	APICC_02249/APICC_02348/APICC_03984/APICC_06867/APICC_07546/APICC_09505/APICC_09904
	GO:0070125	biological process	mitochondrial translational elongation	6/263	70/7047	0.0457314	6	APICC_01433/APICC_02347/APICC_02405/APICC_03594/APICC_03992/APICC_05898
	GO:0001700	biological process	embryonic development via the syncytial blastoderm	11/263	166/7047	0.0458119	11	APICC_01435/APICC_02172/APICC_02614/APICC_04022/APICC_04590/APICC_05503/APICC_06867/APICC_07399/APICC_07406/APICC_09505/APICC_09904
	GO:0031960	biological process	response to corticosteroid	8/263	107/7047	0.0460504	8	APICC_02050/APICC_03079/APICC_06502/APICC_06505/APICC_08142/APICC_08898/APICC_09264/APICC_09646
	GO:0050714	biological process	positive regulation of protein secretion	8/263	107/7047	0.0460504	8	APICC_00669/APICC_03595/APICC_03941/APICC_05286/APICC_05836/APICC_08136/APICC_08898/APICC_09264
	GO:1903578	biological process	regulation of ATP metabolic process	5/263	53/7047	0.0466431	5	APICC_02172/APICC_03560/APICC_03953/APICC_08898/APICC_09264
	GO:0031461	cellular component	cullin-RING ubiquitin ligase complex	8/261	105/6838	0.0467868	8	APICC_00703/APICC_03107/APICC_04379/APICC_05248/APICC_05804/APICC_07411/APICC_08644/APICC_08662
	GO:0010518	biological process	positive regulation of phospholipase activity	3/263	22/7047	0.0468671	3	APICC_03091/APICC_06502/APICC_06505
	GO:0018209	biological process	peptidyl-serine modification	9/263	127/7047	0.0474331	9	APICC_00375/APICC_00669/APICC_02172/APICC_03267/APICC_03515/APICC_03953/APICC_03984/APICC_04022/APICC_08663
	GO:0001706	biological process	endoderm formation	4/263	37/7047	0.0477224	4	APICC_04589/APICC_05836/APICC_06867/APICC_09904
	GO:0051196	biological process	obsolete regulation of coenzyme metabolic process	4/263	37/7047	0.0477224	4	APICC_05577/APICC_07023/APICC_08898/APICC_09264
	GO:0007143	biological process	female meiotic nuclear division	6/263	71/7047	0.0484606	6	APICC_00375/APICC_02249/APICC_02423/APICC_03515/APICC_04022/APICC_09465
	GO:0005840	cellular component	ribosome	12/261	184/6838	0.0484884	12	APICC_00367/APICC_01417/APICC_01433/APICC_02405/APICC_03594/APICC_03596/APICC_03661/APICC_03992/APICC_04967/APICC_05883/APICC_05898/APICC_09107
	GO:0033044	biological process	regulation of chromosome organization	18/263	317/7047	0.049154	18	APICC_00436/APICC_00534/APICC_01418/APICC_02050/APICC_02110/APICC_02172/APICC_02198/APICC_02754/APICC_03953/APICC_04022/APICC_05648/APICC_05885/APICC_07006/APICC_07646/APICC_08136/APICC_08548/APICC_08770/APICC_09042
	GO:0071103	biological process	DNA conformation change	11/263	168/7047	0.0492102	11	APICC_00375/APICC_01418/APICC_01759/APICC_02172/APICC_02897/APICC_03515/APICC_04022/APICC_05648/APICC_08548/APICC_09445/APICC_09650
	GO:0090734	cellular component	site of DNA damage	3/261	22/6838	0.0495426	3	APICC_00534/APICC_01418/APICC_03560
	GO:0033206	biological process	meiotic cytokinesis	5/263	54/7047	0.0499038	5	APICC_02050/APICC_02249/APICC_08516/APICC_09042/APICC_09505

## Sheet: Supplementary Table 7
	Supplementary Table 7 Summary of enriched KEGG metabolic pathways
	ID	Description	GeneRatio	BgRatio	pvalue	Count	geneID
	ame00040	Pentose and glucuronate interconversions	8/119	27/3017	5.48e-06	8	APICC_03079/APICC_03080/APICC_03559/APICC_03604/APICC_03605/APICC_05895/APICC_05896/APICC_08142
	ame00051	Fructose and mannose metabolism	6/119	26/3017	0.000399707	6	APICC_03604/APICC_03605/APICC_05895/APICC_05896/APICC_08898/APICC_09264
	ame00053	Ascorbate and aldarate metabolism	6/119	28/3017	0.000613043	6	APICC_03079/APICC_03080/APICC_03604/APICC_03605/APICC_05896/APICC_08142
	ame00900	Terpenoid backbone biosynthesis	6/119	30/3017	0.000905673	6	APICC_01857/APICC_02051/APICC_05884/APICC_07445/APICC_07476/APICC_07487
	ame00790	Folate biosynthesis	5/119	29/3017	0.00487174	5	APICC_03604/APICC_03605/APICC_05895/APICC_05896/APICC_06705
	ame00561	Glycerolipid metabolism	6/119	50/3017	0.0127438	6	APICC_00436/APICC_02421/APICC_03604/APICC_03605/APICC_05895/APICC_05896
	ame01230	Biosynthesis of amino acids	6/119	52/3017	0.0153172	6	APICC_02894/APICC_03607/APICC_03608/APICC_05501/APICC_07023/APICC_09661
	ame00983	Drug metabolism - other enzymes	6/119	55/3017	0.0198229	6	APICC_00673/APICC_02981/APICC_03079/APICC_03080/APICC_08142/APICC_09900
	ame00980	Metabolism of xenobiotics by cytochrome P450	4/119	28/3017	0.0226388	4	APICC_03079/APICC_03080/APICC_03559/APICC_08142
	ame00860	Porphyrin metabolism	4/119	29/3017	0.0254815	4	APICC_02979/APICC_03079/APICC_03080/APICC_08142
	ame00052	Galactose metabolism	4/119	30/3017	0.0285302	4	APICC_03604/APICC_03605/APICC_05895/APICC_05896
	ame00010	Non-homologous end-joining	2/119	10/3017	0.0564383	2	APICC_01418/APICC_08548
	ame03430	Mismatch repair	3/119	23/3017	0.0596445	3	APICC_02423/APICC_05283/APICC_08974
	ame03460	Fanconi anemia pathway	4/119	39/3017	0.0654383	4	APICC_02423/APICC_04022/APICC_05283/APICC_09650
	ame00830	Retinol metabolism	3/119	28/3017	0.095888	3	APICC_03079/APICC_03080/APICC_08142
	ame00982	Drug metabolism - cytochrome P450	3/119	29/3017	0.104012	3	APICC_03079/APICC_03080/APICC_08142
	ame00520	Amino sugar and nucleotide sugar metabolism	4/119	47/3017	0.112075	4	APICC_03595/APICC_04253/APICC_07881/APICC_08709
	ame00565	Ether lipid metabolism	3/119	30/3017	0.112399	3	APICC_03079/APICC_04607/APICC_08142
	ame03010	Ribosome	8/119	127/3017	0.125521	8	APICC_00367/APICC_01417/APICC_02405/APICC_03596/APICC_03992/APICC_04967/APICC_05883/APICC_07411
	ame01200	Carbon metabolism	7/119	107/3017	0.126915	7	APICC_02894/APICC_03607/APICC_03608/APICC_05835/APICC_06117/APICC_07023/APICC_09661
	ame01210	2-Oxocarboxylic acid metabolism	2/119	16/3017	0.129285	2	APICC_02894/APICC_09661
	ame00564	Glycerophospholipid metabolism	5/119	69/3017	0.134099	5	APICC_00436/APICC_02421/APICC_04607/APICC_09900/APICC_09932
	ame00310	Lysine degradation	4/119	52/3017	0.147008	4	APICC_05648/APICC_06992/APICC_09456/APICC_09801
	ame04150	mTOR signaling pathway	6/119	92/3017	0.152902	6	APICC_00436/APICC_01412/APICC_04380/APICC_06867/APICC_07425/APICC_09904
	ame00030	Pentose phosphate pathway	3/119	36/3017	0.16751	3	APICC_03607/APICC_03608/APICC_05835
	ame03440	Homologous recombination	3/119	38/3017	0.187388	3	APICC_01418/APICC_04744/APICC_05283
	ame00514	Other types of O-glycan biosynthesis	2/119	21/3017	0.199822	2	APICC_06992/APICC_09801
	ame00563	Glycosylphosphatidylinositol (GPI)-anchor biosynthesis	2/119	22/3017	0.214469	2	APICC_03090/APICC_08689
	ame00270	Cysteine and methionine metabolism	3/119	41/3017	0.218259	3	APICC_05501/APICC_06427/APICC_09646
	ame00260	Glycine, serine and threonine metabolism	3/119	42/3017	0.22878	3	APICC_03909/APICC_05501/APICC_07023
	ame00620	Pyruvate metabolism	3/119	45/3017	0.26087	3	APICC_03604/APICC_03605/APICC_05896
	ame00230	Purine metabolism	5/119	90/3017	0.28078	5	APICC_00673/APICC_00721/APICC_02981/APICC_06771/APICC_06868
	ame04624	Toll and Imd signaling pathway	3/119	51/3017	0.326419	3	APICC_00669/APICC_02754/APICC_08975
	ame00430	Taurine and hypotaurine metabolism	1/119	10/3017	0.331711	1	APICC_09646
	ame00920	Sulfur metabolism	1/119	11/3017	0.358158	1	APICC_01578
	ame04137	Mitophagy - animal	3/119	54/3017	0.359341	3	APICC_02564/APICC_03953/APICC_09665
	ame00630	Glyoxylate and dicarboxylate metabolism	2/119	32/3017	0.362017	2	APICC_02894/APICC_09661
	ame00130	Ubiquinone and other terpenoid-quinone biosynthesis	1/119	12/3017	0.383567	1	APICC_05502
	ame00532	Glycosaminoglycan biosynthesis - chondroitin sulfate / dermatan sulfate	1/119	12/3017	0.383567	1	APICC_07619
	ame00600	Sphingolipid metabolism	2/119	34/3017	0.39066	2	APICC_03079/APICC_08142
	ame00670	One carbon pool by folate	1/119	13/3017	0.407978	1	APICC_02858
	ame00730	Thiamine metabolism	1/119	14/3017	0.431431	1	APICC_03994
	ame00020	Citrate cycle (TCA cycle)	2/119	37/3017	0.43252	2	APICC_02894/APICC_09661
	ame04330	Notch signaling pathway	2/119	37/3017	0.43252	2	APICC_06867/APICC_09904
	ame03030	DNA replication	2/119	38/3017	0.446139	2	APICC_00648/APICC_05283
	ame00592	alpha-Linolenic acid metabolism	1/119	15/3017	0.453961	1	APICC_04607
	ame00240	Pyrimidine metabolism	2/119	40/3017	0.472825	2	APICC_02981/APICC_08144
	ame00591	Linoleic acid metabolism	1/119	16/3017	0.475606	1	APICC_04607
	ame00480	Glutathione metabolism	2/119	41/3017	0.48588	2	APICC_02981/APICC_05835
	ame00511	Other glycan degradation	1/119	17/3017	0.4964	1	APICC_02859
	ame04146	Peroxisome	3/119	71/3017	0.536707	3	APICC_00673/APICC_05884/APICC_07253
	ame00590	Arachidonic acid metabolism	1/119	27/3017	0.664235	1	APICC_04607
	ame00981	Insect hormone biosynthesis	1/119	27/3017	0.664235	1	APICC_01857
	ame04214	Apoptosis - fly	2/119	57/3017	0.665777	2	APICC_02050/APICC_04022
	ame04130	SNARE interactions in vesicular transport	1/119	28/3017	0.677598	1	APICC_09338
	ame04341	Hedgehog signaling pathway - fly	1/119	30/3017	0.702762	1	APICC_03414
	ame04013	MAPK signaling pathway - fly	3/119	94/3017	0.726153	3	APICC_00669/APICC_02754/APICC_08575
	ame03040	Spliceosome	4/119	125/3017	0.736506	4	APICC_02194/APICC_02296/APICC_03609/APICC_05252
	ame04745	Phototransduction - fly	1/119	34/3017	0.747394	1	APICC_03091
	ame03018	RNA degradation	2/119	70/3017	0.771911	2	APICC_02111/APICC_05885
	ame04068	FoxO signaling pathway	2/119	70/3017	0.771911	2	APICC_00669/APICC_02172
	ame04512	ECM-receptor interaction	1/119	38/3017	0.785372	1	APICC_04589
	ame03420	Nucleotide excision repair	1/119	42/3017	0.817681	1	APICC_05283
	ame04350	TGF-beta signaling pathway	1/119	44/3017	0.831977	1	APICC_04023
	ame04120	Ubiquitin mediated proteolysis	3/119	113/3017	0.832493	3	APICC_00703/APICC_02195/APICC_02198
	ame00970	Aminoacyl-tRNA biosynthesis	1/119	45/3017	0.838703	1	APICC_01858
	ame03050	Proteasome	1/119	45/3017	0.838703	1	APICC_05282
	ame04310	Wnt signaling pathway	2/119	85/3017	0.857048	2	APICC_06867/APICC_09904
	ame04144	Endocytosis	4/119	156/3017	0.873864	4	APICC_00347/APICC_01435/APICC_03094/APICC_06584
	ame00562	Inositol phosphate metabolism	1/119	52/3017	0.878865	1	APICC_06512
	ame03013	Nucleocytoplasmic transport	2/119	91/3017	0.882182	2	APICC_03609/APICC_04317
	ame04080	Neuroactive ligand-receptor interaction	2/119	92/3017	0.885955	2	APICC_06502/APICC_06505
	ame04142	Lysosome	2/119	93/3017	0.889617	2	APICC_02859/APICC_04824
	ame04070	Phosphatidylinositol signaling system	1/119	63/3017	0.922866	1	APICC_01578
	ame04391	Hippo signaling pathway - fly	1/119	69/3017	0.939743	1	APICC_09505
	ame03015	mRNA surveillance pathway	1/119	75/3017	0.952951	1	APICC_00281
	ame04141	Protein processing in endoplasmic reticulum	2/119	138/3017	0.97643	2	APICC_03560/APICC_06096
	ame04140	Autophagy - animal	1/119	95/3017	0.979454	1	APICC_07054
	ame00190	Oxidative phosphorylation	1/119	98/3017	0.981864	1	APICC_03606

## Sheet: Supplementary Table 8
	Supplementary Table 8 Some of the significantly enriched entries (P < 0.05) are subject to selection gene statistics .
	Term ID	Description	Enrichment category	Gene_ID	log2（PiEastern/PiWestern)	Fst	Product
	GO:1900744	Regulation of p38MAPK cascade	GO	APICC_02754	0.0882952	0.0328932	Mitogen-activated protein kinase kinase kinase
				APICC_03609	0.315698	0.180442	Putative pre-mRNA-splicing factor ATP-dependent RNA helicase DHX15
				APICC_07647	0.457334	0.0548181	SAM and SH3 domain-containing protein
				APICC_08136	0.0882952	0.0328932	Moesin/ezrin/radixin
	GO:0030316	Osteoclast differentiation	GO	APICC_00669	0.177029	0.0417916	Mitogen-activated protein kinase
				APICC_06502	0.0447956	0.0568407	Calcitonin receptor
				APICC_06505	0.0764814	0.0606885	Calcitonin receptor
				APICC_09661	0.211465	0.026135	Cytoplasmic aconitate hydratase
				APICC_02894	0.211465	0.026135	Cytoplasmic aconitate hydratase
	GO:0061982	Meiosis I cell cycle process	GO	APICC_00375	0.132241	0.0272301	Nucleosomal histone kinase
				APICC_00534	0.127287	0.0693911	Structural maintenance of chromosomes protein
				APICC_01418	0.0347675	0.0286336	Double-stranded RNA-specific editase Adar
				APICC_02050	0.0607326	0.0732507	Lamin Dm0
				APICC_02198	0.0347675	0.0286336	Ubiquitin-conjugating enzyme E2
				APICC_02423	0.315698	0.180442	Chromodomain-helicase-DNA-binding protein
				APICC_03515	0.132241	0.0272301	Microtubule-associated serine/threonine-protein kinase
				APICC_04022	0.0700887	0.0252249	Serine/threonine-protein kinase atr
				APICC_08516	0.0836985	0.0754955	Kinesin protein KIF18A
				APICC_08663	0.0488631	0.0284685	Serine/threonine-protein kinase Doa
				APICC_08974	0.869919	0.0431728	DNA mismatch repair protein Mlh3
				APICC_09505	0.097877	0.0282349	Protein diaphanous
				APICC_09650	0.241248	0.0376893	Fanconi anemia group M protein
	GO:1902533	Positive regulation of intracellular signal transduction	GO	APICC_09465	0.869919	0.0431728	Heat shock factor
				APICC_06502	0.0447956	0.0568407	Calcitonin receptor
				APICC_06505	0.0764814	0.0606885	Calcitonin receptor
				APICC_00436	0.115428	0.0274688	Phosphatidate phosphatase LPIN2
				APICC_00669	0.177029	0.0417916	Mitogen-activated protein kinase
				APICC_01858	0.046061	0.0251082	MAP kinase-activating death domain protein
				APICC_02050	0.0607326	0.0732507	Lamin Dm0
				APICC_02170	0.0620384	0.0932227	Protein strawberry notch
				APICC_02564	0.0661831	0.0323228	Mitochondrial fission
				APICC_02754	0.0882952	0.0328932	Mitogen-activated protein kinase kinase kinase
				APICC_03267	0.152908	0.0320981	Serine/threonine-protein kinase OSR1
				APICC_03414	0.323518	0.0395897	Protein cubitus interruptus
				APICC_03558	0.102792	0.0344021	Zinc transporter
				APICC_03597	0.132241	0.0272301	Serologically defined colon cancer antigen
				APICC_03609	0.315698	0.180442	Putative pre-mRNA-splicing factor ATP-dependent RNA helicase DHX15
				APICC_03953	0.110293	0.0310185	Nucleosomal histone kinase
				APICC_03984	0.241248	0.0376893	Serine/threonine-protein kinase PAK mbt
				APICC_04019	0.039076	0.0274366	COP9 signalosome complex subunit
				APICC_04022	0.0700887	0.0252249	Serine/threonine-protein kinase atr
				APICC_04023	0.0700887	0.0252249	Neogenin
				APICC_04380	0.211465	0.026135	hypothetical protein
				APICC_04824	0.205685	0.033949	LITAF protein
				APICC_05501	0.0607326	0.0732507	Cystathionine gamma-lyase
				APICC_06867	0.127287	0.0693911	Segment polarity protein dishevelled DVL-1
				APICC_07425	0.331597	0.276489	WD repeat-containing protein mio-B
				APICC_07647	0.457334	0.0548181	SAM and SH3 domain-containing protein
				APICC_09904	0.127287	0.0693911	Segment polarity protein dishevelled protein DVL-3
	GO:0055021	Regulation of cardiac muscle tissue growth	GO	APICC_00669	0.177029	0.0417916	Mitogen-activated protein kinase
				APICC_02110	0.205685	0.033949	Protein Jumonji
				APICC_02172	0.170376	0.0661795	G2/mitotic-specific cyclin-B
				APICC_03414	0.323518	0.0395897	Protein cubitus interruptus
				APICC_05835	0.184553	0.107518	Glucose-6-phosphate 1-dehydrogenase
				APICC_06877	0.039076	0.0274366	RNA polymerase II subunit
				APICC_07476	0.0947625	0.0409908	Farnesyl pyrophosphate synthase
	ame00040	Pentose and glucuronate interconversions	KEGG	APICC_05895	0.534829	0.169433	N(2),N(2)-dimethylguanosine tRNA methyltransferase
				APICC_05896	0.534829	0.169433	Alcohol dehydrogenase [NADP+] A
				APICC_08142	0.0447956	0.0568407	Ecdysteroid UDP-glucosyltransferase
				APICC_03605	0.534829	0.169433	Aldose reductase
				APICC_03604	0.534829	0.169433	Alcohol dehydrogenase [NADP+] A
				APICC_03079	0.0447956	0.0568407	UDP-glucuronosyltransferase
				APICC_03080	0.0447956	0.0568407	UDP-glucuronosyltransferase
				APICC_03559	0.102792	0.0344021	Trans-1%2C2-dihydrobenzene-1%2C2-diol dehydrogenase
	ame00900	Terpenoid backbone biosynthesis	KEGG	APICC_01857	0.046061	0.0251082	Dehydrogenase/reductase SDR family member
				APICC_02051	0.0607326	0.0732507	Prenylcysteine oxidase
				APICC_05884	0.117335	0.0647811	Phosphomevalonate kinase
				APICC_07445	0.209699	0.0802689	Farnesyl pyrophosphate synthase
				APICC_07476	0.0947625	0.0409908	Farnesyl pyrophosphate synthase
				APICC_07487	0.262483	0.3437	Farnesyl pyrophosphate synthase
	ame01230	Biosynthesis of amino acids	KEGG	APICC_02894	0.211465	0.026135	Cytoplasmic aconitate hydratase
				APICC_03607	0.315698	0.180442	Ribose-5-phosphate isomerase
				APICC_03608	0.315698	0.180442	Cardioactive peptide
				APICC_05501	0.0607326	0.0732507	Cystathionine gamma-lyase
				APICC_07023	0.288056	0.0362364	Phosphoglycerate mutase
				APICC_09661	0.211465	0.026135	Cytoplasmic aconitate hydratase
	ame00561	Glycerolipid metabolism	KEGG	APICC_03605	0.534829	0.169433	Aldose reductase
				APICC_03604	0.534829	0.169433	Alcohol dehydrogenase [NADP+] A
				APICC_03079	0.0447956	0.0568407	UDP-glucuronosyltransferase
				APICC_03080	0.0447956	0.0568407	UDP-glucuronosyltransferase
				APICC_00436	0.115428	0.0274688	Phosphatidate phosphatase LPIN2
				APICC_02421	0.534829	0.169433	Glycerol-3-phosphate acyltransferase
